# Supplementary material for: Incidence of pancreatic cancer is dramatically increased by a high fat, high calorie diet in KrasG12D mice
Source: PLOS journal article supplement (doi:10.1371/journal.pone.0184455), 2017-09-08
Supplement: S3 (10.1371/journal.pone.0184455.s003) [file redirect.do]

**t-test**

Thursday, May 25, 2017, 12:04:18

**Data source:** sirius red in Notebook**Normality Test:** Passed (P > 0.200)**Equal Variance Test:** Passed (P = 0.854)

| Group Name | N  | Missing | Mean   | Std Dev | SEM   |
|------------|----|---------|--------|---------|-------|
| 6M-CD      | 22 | 0       | 13.445 | 7.215   | 1.538 |
| 6M-HF      | 27 | 0       | 33.332 | 7.163   | 1.379 |

Difference -19.887

t = -9.635 with 47 degrees of freedom. (P = &lt;0.001)

95 percent confidence interval for difference of means: -24.040 to -15.735

The difference in the mean values of the two groups is greater than would be expected by chance; there is a statistically significant difference between the input groups (P = <0.001).

Power of performed test with alpha = 0.050: 1.000
