# Supplementary material for: Incidence of pancreatic cancer is dramatically increased by a high fat, high calorie diet in KrasG12D mice
Source: PLOS journal article supplement (doi:10.1371/journal.pone.0184455), 2017-09-08
Supplement: S3 (10.1371/journal.pone.0184455.s003) [file redirect.do]

## Two Way Analysis of Variance

Thursday, May 25, 2017, 11:58:45

**Data source:** sirius red in Notebook

General Linear Model

Dependent Variable: % stained area

**Normality Test:** Passed (P > 0.200)

**Equal Variance Test:** Failed (P = 0.003)

| Source of Variation | DF  | SS        | MS       | F      | P      |
|---------------------|-----|-----------|----------|--------|--------|
| time                | 3   | 3896.757  | 1298.919 | 28.686 | <0.001 |
| diet                | 1   | 2351.785  | 2351.785 | 51.938 | <0.001 |
| time x diet         | 3   | 2573.671  | 857.890  | 18.946 | <0.001 |
| Residual            | 149 | 6746.856  | 45.281   |        |        |
| Total               | 156 | 17200.886 | 110.262  |        |        |

The difference in the mean values among the different levels of time is greater than would be expected by chance after allowing for effects of differences in diet. There is a statistically significant difference (P = <0.001). To isolate which group(s) differ from the others use a multiple comparison procedure.

The difference in the mean values among the different levels of diet is greater than would be expected by chance after allowing for effects of differences in time. There is a statistically significant difference (P = <0.001). To isolate which group(s) differ from the others use a multiple comparison procedure.

The effect of different levels of time depends on what level of diet is present. There is a statistically significant interaction between time and diet. (P = <0.001)

Power of performed test with alpha = 0.0500: for time : 1.000

Power of performed test with alpha = 0.0500: for diet : 1.000

Power of performed test with alpha = 0.0500: for time x diet : 1.000

Least square means for time :

| Group | Mean   | SEM   |
|-------|--------|-------|
| 3M    | 13.228 | 1.117 |
| 6M    | 23.389 | 0.966 |
| 9M    | 23.489 | 1.069 |
| 12M   | 27.609 | 1.241 |

Least square means for diet :

| Group | Mean   | SEM   |
|-------|--------|-------|
| CD    | 17.956 | 0.810 |
| HF    | 25.902 | 0.748 |

Least square means for time x diet :

| Group   | Mean   | SEM   |
|---------|--------|-------|
| 3M x CD | 8.637  | 1.468 |
| 3M x HF | 17.820 | 1.682 |
| 6M x CD | 13.445 | 1.435 |
| 6M x HF | 33.332 | 1.295 |
| 9M x CD | 20.750 | 1.586 |

|          |        |       |          |        |       |
|----------|--------|-------|----------|--------|-------|
| 9M x HF  | 26.228 | 1.435 | 12M x CD | 28.990 | 1.943 |
| 12M x HF | 26.228 | 1.544 |          |        |       |

All Pairwise Multiple Comparison Procedures (Tukey Test):

Comparisons for factor: **time**

| Comparison | Diff of Means | p | q      | P      | P<0.050 |
|------------|---------------|---|--------|--------|---------|
| 12M vs. 3M | 14.380        | 4 | 12.185 | <0.001 | Yes     |
| 12M vs. 6M | 4.220         | 4 | 3.795  | 0.037  | Yes     |
| 12M vs. 9M | 4.120         | 4 | 3.557  | 0.058  | No      |
| 9M vs. 3M  | 10.260        | 4 | 9.386  | <0.001 | Yes     |
| 9M vs. 6M  | 0.100         | 4 | 0.0984 | 1.000  | No      |
| 6M vs. 3M  | 10.160        | 4 | 9.731  | <0.001 | Yes     |

Comparisons for factor: **diet**

| Comparison | Diff of Means | p | q      | P      | P<0.050 |
|------------|---------------|---|--------|--------|---------|
| HF vs. CD  | 7.946         | 2 | 10.192 | <0.001 | Yes     |

Comparisons for factor: **diet within 3M**

| Comparison | Diff of Means | p | q     | P      | P<0.05 |
|------------|---------------|---|-------|--------|--------|
| HF vs. CD  | 9.182         | 2 | 5.815 | <0.001 | Yes    |

Comparisons for factor: **diet within 6M**

| Comparison | Diff of Means | p | q      | P      | P<0.05 |
|------------|---------------|---|--------|--------|--------|
| HF vs. CD  | 19.887        | 2 | 14.552 | <0.001 | Yes    |

Comparisons for factor: **diet within 9M**

| Comparison | Diff of Means | p | q     | P     | P<0.05 |
|------------|---------------|---|-------|-------|--------|
| HF vs. CD  | 5.478         | 2 | 3.622 | 0.010 | Yes    |

Comparisons for factor: **diet within 12M**

| Comparison | Diff of Means | p | q     | P     | P<0.05 |
|------------|---------------|---|-------|-------|--------|
| CD vs. HF  | 2.762         | 2 | 1.574 | 0.266 | No     |

Comparisons for factor: **time within CD**

| Comparison | Diff of Means | p | q      | P      | P<0.05 |
|------------|---------------|---|--------|--------|--------|
| 12M vs. 3M | 20.353        | 4 | 11.820 | <0.001 | Yes    |
| 12M vs. 6M | 15.545        | 4 | 9.104  | <0.001 | Yes    |
| 12M vs. 9M | 8.240         | 4 | 4.647  | 0.006  | Yes    |
| 9M vs. 3M  | 12.113        | 4 | 7.925  | <0.001 | Yes    |
| 9M vs. 6M  | 7.305         | 4 | 4.831  | 0.004  | Yes    |
| 6M vs. 3M  | 4.808         | 4 | 3.312  | 0.089  | No     |

Comparisons for factor: **time within HF**

| Comparison | Diff of Means | p | q      | P      | P<0.05 |
|------------|---------------|---|--------|--------|--------|
| 6M vs. 3M  | 15.513        | 4 | 10.334 | <0.001 | Yes    |

|            |            |   |            |        |     |            |       |   |       |
|------------|------------|---|------------|--------|-----|------------|-------|---|-------|
| 6M vs. 9M  | 7.105      | 4 | 5.199      | 0.001  | Yes | 6M vs. 12M | 7.105 | 4 | 4.986 |
| 0.002      | Yes        |   |            |        |     |            |       |   |       |
| 12M vs. 3M | 8.408      | 4 | 5.208      | 0.001  | Yes |            |       |   |       |
| 12M vs. 9M | 0.00000957 | 4 | 0.00000642 | 1.000  | No  |            |       |   |       |
| 9M vs. 3M  | 8.408      | 4 | 5.378      | <0.001 | Yes |            |       |   |       |
