# Supplementary material for: Incidence of pancreatic cancer is dramatically increased by a high fat, high calorie diet in KrasG12D mice
Source: PLOS journal article supplement (doi:10.1371/journal.pone.0184455), 2017-09-08
Supplement: S3 (10.1371/journal.pone.0184455.s003) [file redirect.do]

## Two Way Analysis of Variance

Thursday, May 25, 2017, 12:10:30

**Data source:** sirius red in Notebook

General Linear Model

Dependent Variable: Col 13

**Normality Test:** Passed (P > 0.200)

**Equal Variance Test:** Passed (P = 0.049)

| Source of Variation | DF | SS       | MS      | F      | P      |
|---------------------|----|----------|---------|--------|--------|
| time2               | 3  | 632.236  | 210.745 | 30.420 | <0.001 |
| diet2               | 1  | 402.507  | 402.507 | 58.100 | <0.001 |
| time2 x diet2       | 3  | 340.063  | 113.354 | 16.362 | <0.001 |
| Residual            | 16 | 110.845  | 6.928   |        |        |
| Total               | 23 | 1545.989 | 67.217  |        |        |

The difference in the mean values among the different levels of time2 is greater than would be expected by chance after allowing for effects of differences in diet2. There is a statistically significant difference (P = <0.001). To isolate which group(s) differ from the others use a multiple comparison procedure.

The difference in the mean values among the different levels of diet2 is greater than would be expected by chance after allowing for effects of differences in time2. There is a statistically significant difference (P = <0.001). To isolate which group(s) differ from the others use a multiple comparison procedure.

The effect of different levels of time2 depends on what level of diet2 is present. There is a statistically significant interaction between time2 and diet2. (P = <0.001)

Power of performed test with alpha = 0.0500: for time2 : 1.000

Power of performed test with alpha = 0.0500: for diet2 : 1.000

Power of performed test with alpha = 0.0500: for time2 x diet2 : 1.000

Least square means for time2 :

| Group | Mean   | SEM   |
|-------|--------|-------|
| 3M    | 12.952 | 1.075 |
| 6M    | 23.265 | 1.075 |
| 9M    | 23.127 | 1.005 |
| 12M   | 27.222 | 1.201 |

Least square means for diet2 :

| Group | Mean   | SEM   |
|-------|--------|-------|
| CD    | 17.482 | 0.806 |
| HF    | 25.800 | 0.736 |

Least square means for time2 x diet2 :

| Group   | Mean   | SEM   |
|---------|--------|-------|
| 3M x CD | 8.637  | 1.520 |
| 3M x HF | 17.267 | 1.520 |
| 6M x CD | 13.200 | 1.520 |
| 6M x HF | 33.330 | 1.520 |
| 9M x CD | 19.913 | 1.520 |

|          |        |       |          |        |       |
|----------|--------|-------|----------|--------|-------|
| 9M x HF  | 26.340 | 1.316 | 12M x CD | 28.180 | 1.861 |
| 12M x HF | 26.263 | 1.520 |          |        |       |

All Pairwise Multiple Comparison Procedures (Tukey Test):

Comparisons for factor: **time2**

| Comparison | Diff of Means | p | q      | P      | P<0.050     |
|------------|---------------|---|--------|--------|-------------|
| 12M vs. 3M | 14.270        | 4 | 12.521 | <0.001 | Yes         |
| 12M vs. 9M | 4.095         | 4 | 3.697  | 0.080  | No          |
| 12M vs. 6M | 3.957         | 4 | 3.472  | 0.106  | Do Not Test |
| 6M vs. 3M  | 10.313        | 4 | 9.598  | <0.001 | Yes         |
| 6M vs. 9M  | 0.138         | 4 | 0.133  | 1.000  | Do Not Test |
| 9M vs. 3M  | 10.175        | 4 | 9.780  | <0.001 | Yes         |

Comparisons for factor: **diet2**

| Comparison | Diff of Means | p | q      | P      | P<0.050 |
|------------|---------------|---|--------|--------|---------|
| HF vs. CD  | 8.317         | 2 | 10.780 | <0.001 | Yes     |

Comparisons for factor: **diet2 within 3M**

| Comparison | Diff of Means | p | q     | P     | P<0.05 |
|------------|---------------|---|-------|-------|--------|
| HF vs. CD  | 8.630         | 2 | 5.679 | 0.001 | Yes    |

Comparisons for factor: **diet2 within 6M**

| Comparison | Diff of Means | p | q      | P      | P<0.05 |
|------------|---------------|---|--------|--------|--------|
| HF vs. CD  | 20.130        | 2 | 13.247 | <0.001 | Yes    |

Comparisons for factor: **diet2 within 9M**

| Comparison | Diff of Means | p | q     | P     | P<0.05 |
|------------|---------------|---|-------|-------|--------|
| HF vs. CD  | 6.427         | 2 | 4.521 | 0.006 | Yes    |

Comparisons for factor: **diet2 within 12M**

| Comparison | Diff of Means | p | q     | P     | P<0.05 |
|------------|---------------|---|-------|-------|--------|
| CD vs. HF  | 1.917         | 2 | 1.128 | 0.437 | No     |

Comparisons for factor: **time2 within CD**

| Comparison | Diff of Means | p | q      | P      | P<0.05 |
|------------|---------------|---|--------|--------|--------|
| 12M vs. 3M | 19.543        | 4 | 11.503 | <0.001 | Yes    |
| 12M vs. 6M | 14.980        | 4 | 8.817  | <0.001 | Yes    |
| 12M vs. 9M | 8.267         | 4 | 4.866  | 0.016  | Yes    |
| 9M vs. 3M  | 11.277        | 4 | 7.421  | <0.001 | Yes    |
| 9M vs. 6M  | 6.713         | 4 | 4.418  | 0.030  | Yes    |
| 6M vs. 3M  | 4.563         | 4 | 3.003  | 0.188  | No     |

Comparisons for factor: **time2 within HF**

| Comparison | Diff of Means | p | q      | P      | P<0.05 |
|------------|---------------|---|--------|--------|--------|
| 6M vs. 3M  | 16.063        | 4 | 10.571 | <0.001 | Yes    |

|            |        |   |        |       |     |           |       |   |       |       |
|------------|--------|---|--------|-------|-----|-----------|-------|---|-------|-------|
| 6M vs. 12M | 7.067  | 4 | 4.650  | 0.022 | Yes | 6M vs. 9M | 6.990 | 4 | 4.917 | 0.015 |
| Yes        |        |   |        |       |     |           |       |   |       |       |
| 9M vs. 3M  | 9.073  | 4 | 6.383  | 0.002 | Yes |           |       |   |       |       |
| 9M vs. 12M | 0.0767 | 4 | 0.0539 | 1.000 | No  |           |       |   |       |       |
| 12M vs. 3M | 8.997  | 4 | 5.920  | 0.004 | Yes |           |       |   |       |       |

A result of "Do Not Test" occurs for a comparison when no significant difference is found between two means that enclose that comparison. For example, if you had four means sorted in order, and found no difference between means 4 vs. 2, then you would not test 4 vs. 3 and 3 vs. 2, but still test 4 vs. 1 and 3 vs. 1 (4 vs. 3 and 3 vs. 2 are enclosed by 4 vs. 2: 4 3 2 1). Note that not testing the enclosed means is a procedural rule, and a result of Do Not Test should be treated as if there is no significant difference between the means, even though one may appear to exist.
