# Supplementary material for: Incidence of pancreatic cancer is dramatically increased by a high fat, high calorie diet in KrasG12D mice
Source: PLOS journal article supplement (doi:10.1371/journal.pone.0184455), 2017-09-08
Supplement: S3 (10.1371/journal.pone.0184455.s003) [file redirect.do]

**t-test**

Thursday, May 25, 2017, 18:35:28

**Data source:** western OD in Notebook**Normality Test:** Passed (P > 0.200)**Equal Variance Test:** Passed (P = 0.514)

| Group Name | N | Missing | Mean  | Std Dev | SEM    |
|------------|---|---------|-------|---------|--------|
| Amylase_CD | 3 | 0       | 1.000 | 0.305   | 0.176  |
| Amylase_HF | 3 | 0       | 0.461 | 0.115   | 0.0664 |

Difference 0.539

t = 2.866 with 4 degrees of freedom. (P = 0.046)

95 percent confidence interval for difference of means: 0.0168 to 1.062

The difference in the mean values of the two groups is greater than would be expected by chance; there is a statistically significant difference between the input groups (P = 0.046).

Power of performed test with alpha = 0.050: 0.530

The power of the performed test (0.530) is below the desired power of 0.800.  
You should interpret the negative findings cautiously.
