# Supplementary material for: Incidence of pancreatic cancer is dramatically increased by a high fat, high calorie diet in KrasG12D mice
Source: PLOS journal article supplement (doi:10.1371/journal.pone.0184455), 2017-09-08
Supplement: S3 (10.1371/journal.pone.0184455.s003) [file redirect.do]

**t-test**

Thursday, May 25, 2017, 12:05:36

**Data source:** sirius red in Notebook**Normality Test:** Passed (P > 0.200)**Equal Variance Test:** Passed (P = 0.493)

| Group Name | N  | Missing | Mean   | Std Dev | SEM   |
|------------|----|---------|--------|---------|-------|
| 9M-CD      | 18 | 0       | 20.750 | 5.204   | 1.227 |
| 9M-HF      | 22 | 0       | 26.228 | 6.272   | 1.337 |

Difference -5.478

t = -2.962 with 38 degrees of freedom. (P = 0.005)

95 percent confidence interval for difference of means: -9.221 to -1.734

The difference in the mean values of the two groups is greater than would be expected by chance; there is a statistically significant difference between the input groups (P = 0.005).

Power of performed test with alpha = 0.050: 0.788

The power of the performed test (0.788) is below the desired power of 0.800.  
You should interpret the negative findings cautiously.
