# Supplementary material for: Incidence of pancreatic cancer is dramatically increased by a high fat, high calorie diet in KrasG12D mice
Source: PLOS journal article supplement (doi:10.1371/journal.pone.0184455), 2017-09-08
Supplement: S3 (10.1371/journal.pone.0184455.s003) [file redirect.do]

**t-test**

Thursday, May 25, 2017, 18:33:12

**Data source:** western OD in Notebook**Normality Test:** Passed (P > 0.200)**Equal Variance Test:** Passed (P = 0.777)

| Group Name | N | Missing | Mean  | Std Dev | SEM   |
|------------|---|---------|-------|---------|-------|
| pSTAT_CD   | 3 | 0       | 1.000 | 0.381   | 0.220 |
| pSTAT_HF   | 3 | 0       | 2.158 | 0.609   | 0.351 |

Difference -1.158

t = -2.793 with 4 degrees of freedom. (P = 0.049)

95 percent confidence interval for difference of means: -2.309 to -0.00691

The difference in the mean values of the two groups is greater than would be expected by chance; there is a statistically significant difference between the input groups (P = 0.049).

Power of performed test with alpha = 0.050: 0.507

The power of the performed test (0.507) is below the desired power of 0.800.  
You should interpret the negative findings cautiously.
