# Supplementary material for: Incidence of pancreatic cancer is dramatically increased by a high fat, high calorie diet in KrasG12D mice
Source: PLOS journal article supplement (doi:10.1371/journal.pone.0184455), 2017-09-08
Supplement: S3 (10.1371/journal.pone.0184455.s003) [file redirect.do]

**t-test**

Thursday, May 25, 2017, 18:36:09

**Data source:** western OD in Notebook**Normality Test:** Passed (P > 0.200)**Equal Variance Test:** Passed (P = 0.676)

| Group Name | N | Missing | Mean  | Std Dev | SEM   |
|------------|---|---------|-------|---------|-------|
| SMA_CD     | 3 | 0       | 1.000 | 0.484   | 0.280 |
| SMA_HF     | 3 | 0       | 1.663 | 0.709   | 0.410 |

Difference -0.663

t = -1.336 with 4 degrees of freedom. (P = 0.252)

95 percent confidence interval for difference of means: -2.039 to 0.714

The difference in the mean values of the two groups is not great enough to reject the possibility that the difference is due to random sampling variability. There is not a statistically significant difference between the input groups (P = 0.252).

Power of performed test with alpha = 0.050: 0.105

The power of the performed test (0.105) is below the desired power of 0.800.  
You should interpret the negative findings cautiously.
