# Supplementary material for: Incidence of pancreatic cancer is dramatically increased by a high fat, high calorie diet in KrasG12D mice
Source: PLOS journal article supplement (doi:10.1371/journal.pone.0184455), 2017-09-08
Supplement: S3 (10.1371/journal.pone.0184455.s003) [file redirect.do]

**t-test**

Thursday, May 25, 2017, 15:55:32

**Data source:** western OD in Notebook**Normality Test:** Passed (P > 0.200)**Equal Variance Test:** Passed (P = 0.621)

| Group Name | N | Missing | Mean  | Std Dev | SEM    |
|------------|---|---------|-------|---------|--------|
| P4HA2_CD   | 3 | 0       | 1.000 | 0.147   | 0.0849 |
| P4HA2      | 3 | 0       | 1.684 | 0.366   | 0.211  |

Difference -0.684

t = -3.008 with 4 degrees of freedom. (P = 0.040)

95 percent confidence interval for difference of means: -1.316 to -0.0527

The difference in the mean values of the two groups is greater than would be expected by chance; there is a statistically significant difference between the input groups (P = 0.040).

Power of performed test with alpha = 0.050: 0.574

The power of the performed test (0.574) is below the desired power of 0.800.  
You should interpret the negative findings cautiously.
