# Supplementary material for: Incidence of pancreatic cancer is dramatically increased by a high fat, high calorie diet in KrasG12D mice
Source: PLOS journal article supplement (doi:10.1371/journal.pone.0184455), 2017-09-08
Supplement: S3 (10.1371/journal.pone.0184455.s003) [file redirect.do]

**t-test**

Thursday, May 25, 2017, 15:54:05

**Data source:** western OD in Notebook**Normality Test:** Passed (P > 0.200)**Equal Variance Test:** Passed (P = 0.274)

| Group Name | N | Missing | Mean  | Std Dev | SEM   |
|------------|---|---------|-------|---------|-------|
| Fibro_CD   | 3 | 0       | 1.003 | 0.211   | 0.122 |
| Fibro_HF   | 3 | 0       | 2.057 | 0.565   | 0.326 |

Difference -1.053

t = -3.024 with 4 degrees of freedom. (P = 0.039)

95 percent confidence interval for difference of means: -2.021 to -0.0861

The difference in the mean values of the two groups is greater than would be expected by chance; there is a statistically significant difference between the input groups (P = 0.039).

Power of performed test with alpha = 0.050: 0.579

The power of the performed test (0.579) is below the desired power of 0.800.  
You should interpret the negative findings cautiously.
