# Supplementary material for: Incidence of pancreatic cancer is dramatically increased by a high fat, high calorie diet in KrasG12D mice
Source: PLOS journal article supplement (doi:10.1371/journal.pone.0184455), 2017-09-08
Supplement: S3 (10.1371/journal.pone.0184455.s003) [file redirect.do]

**t-test**

Thursday, May 25, 2017, 12:03:06

**Data source:** sirius red in Notebook**Normality Test:** Passed (P > 0.200)**Equal Variance Test:** Failed (P = 0.003)

| Group Name | N  | Missing | Mean   | Std Dev | SEM   |
|------------|----|---------|--------|---------|-------|
| 3M-CD      | 21 | 0       | 8.637  | 5.890   | 1.285 |
| 3M-HF      | 16 | 0       | 17.820 | 10.713  | 2.678 |

Difference -9.182

t = -3.331 with 35 degrees of freedom. (P = 0.002)

95 percent confidence interval for difference of means: -14.779 to -3.586

The difference in the mean values of the two groups is greater than would be expected by chance; there is a statistically significant difference between the input groups (P = 0.002).

Power of performed test with alpha = 0.050: 0.888
