# Supplementary figures and images for: Incidence of pancreatic cancer is dramatically increased by a high fat, high calorie diet in KrasG12D mice
Source: PLOS journal article supplement (doi:10.1371/journal.pone.0184455), 2017-09-08

**WT-CD**

**WT-HF**

**KC-CD**

**KC-HF**

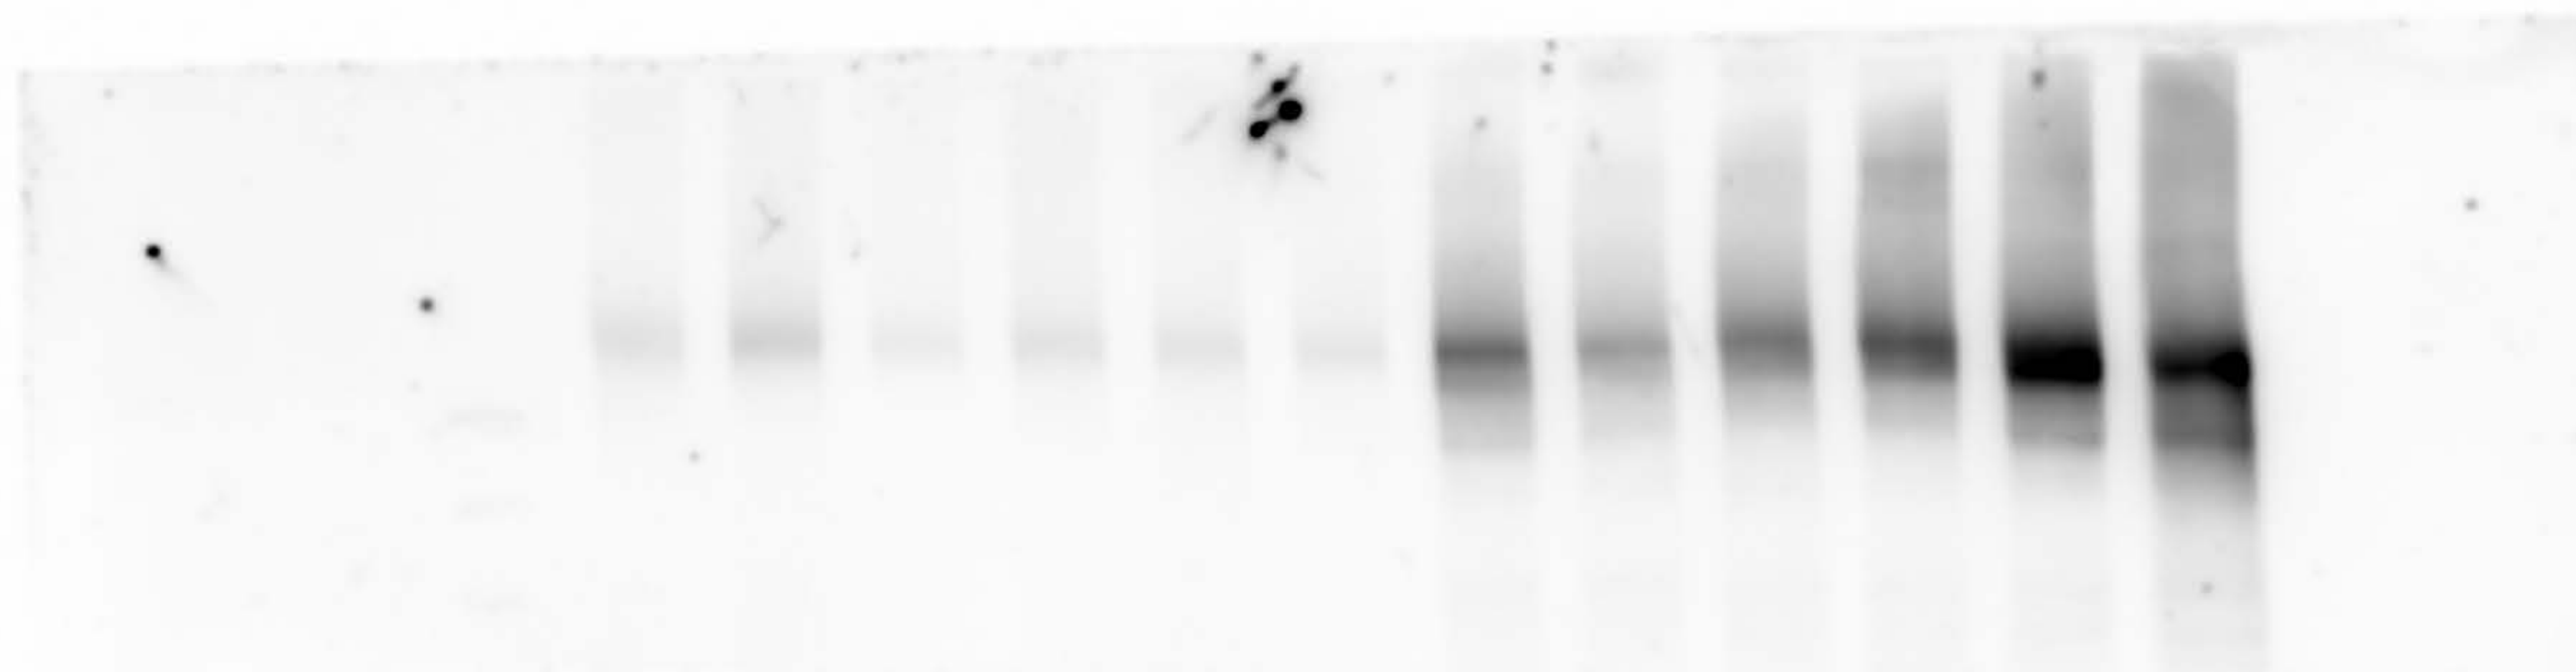

Supplement: S3 (10.1371/journal.pone.0184455.s003) [file redirect.do]

**WT-CD**

**WT-HF**

**KC-CD**

**KC-HF**

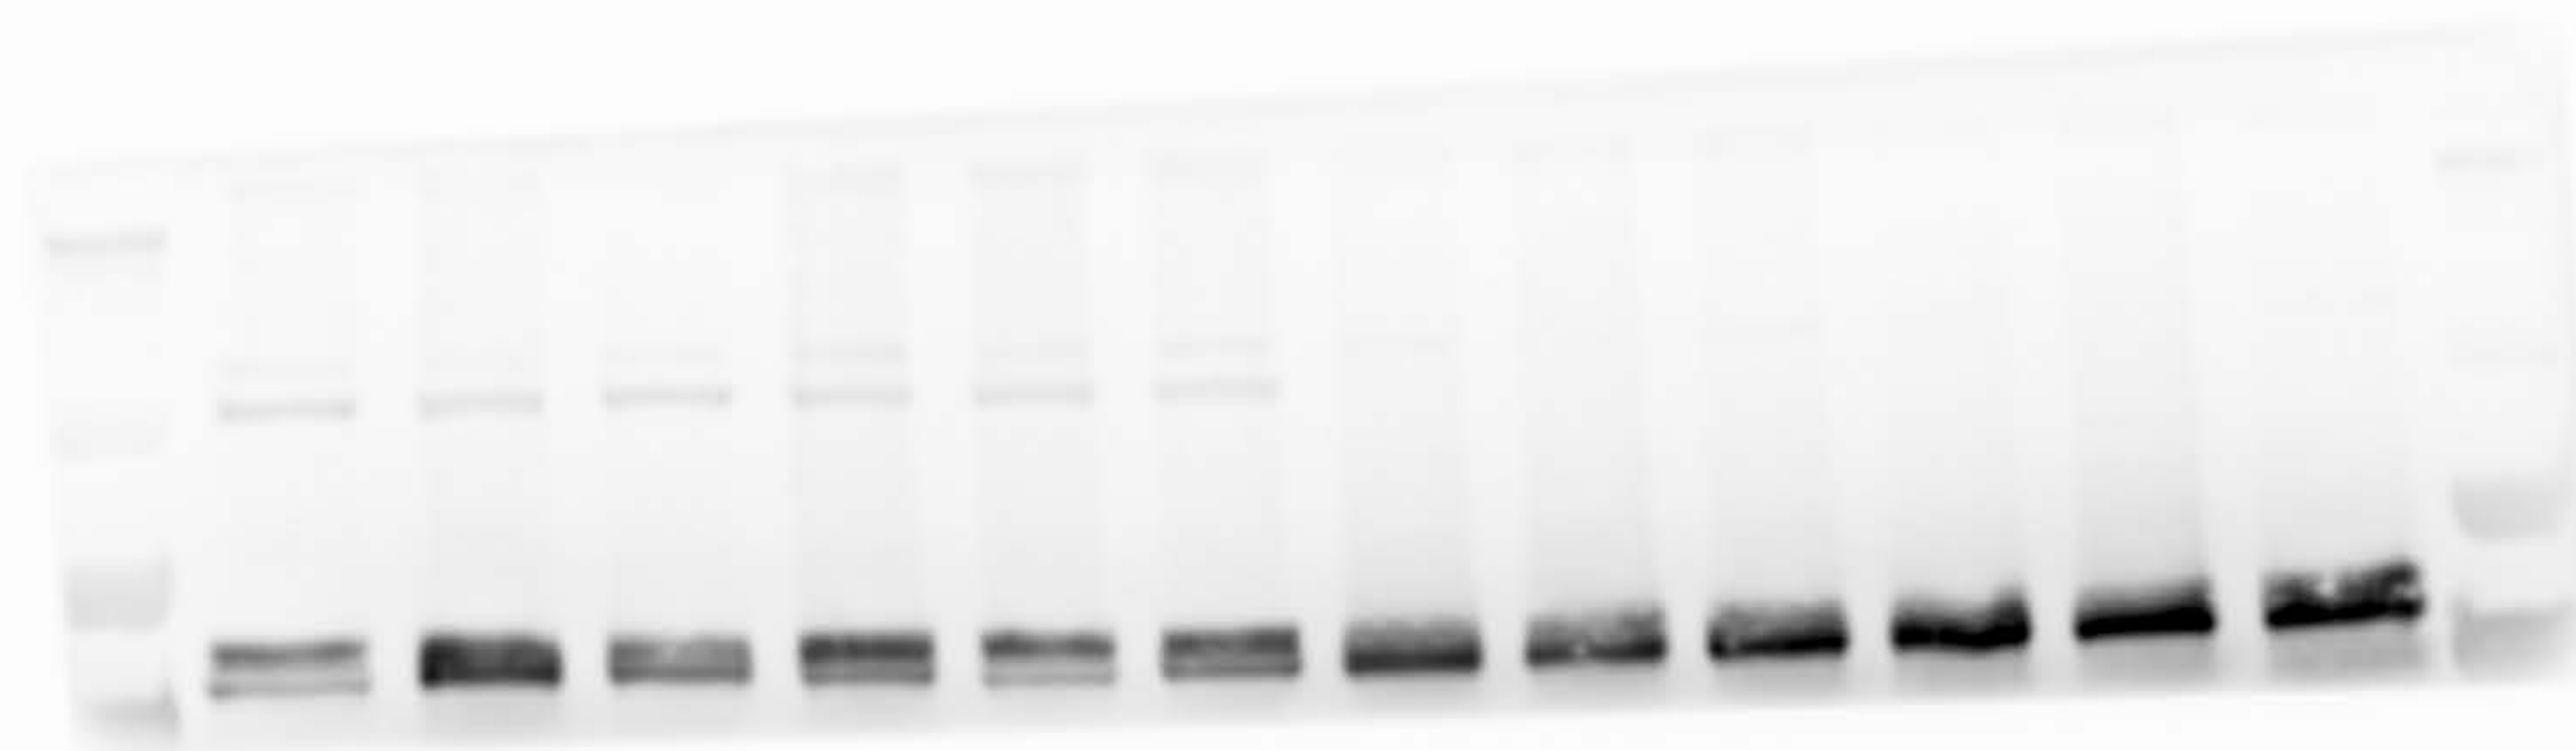

Supplement: S3 (10.1371/journal.pone.0184455.s003) [file redirect.do]

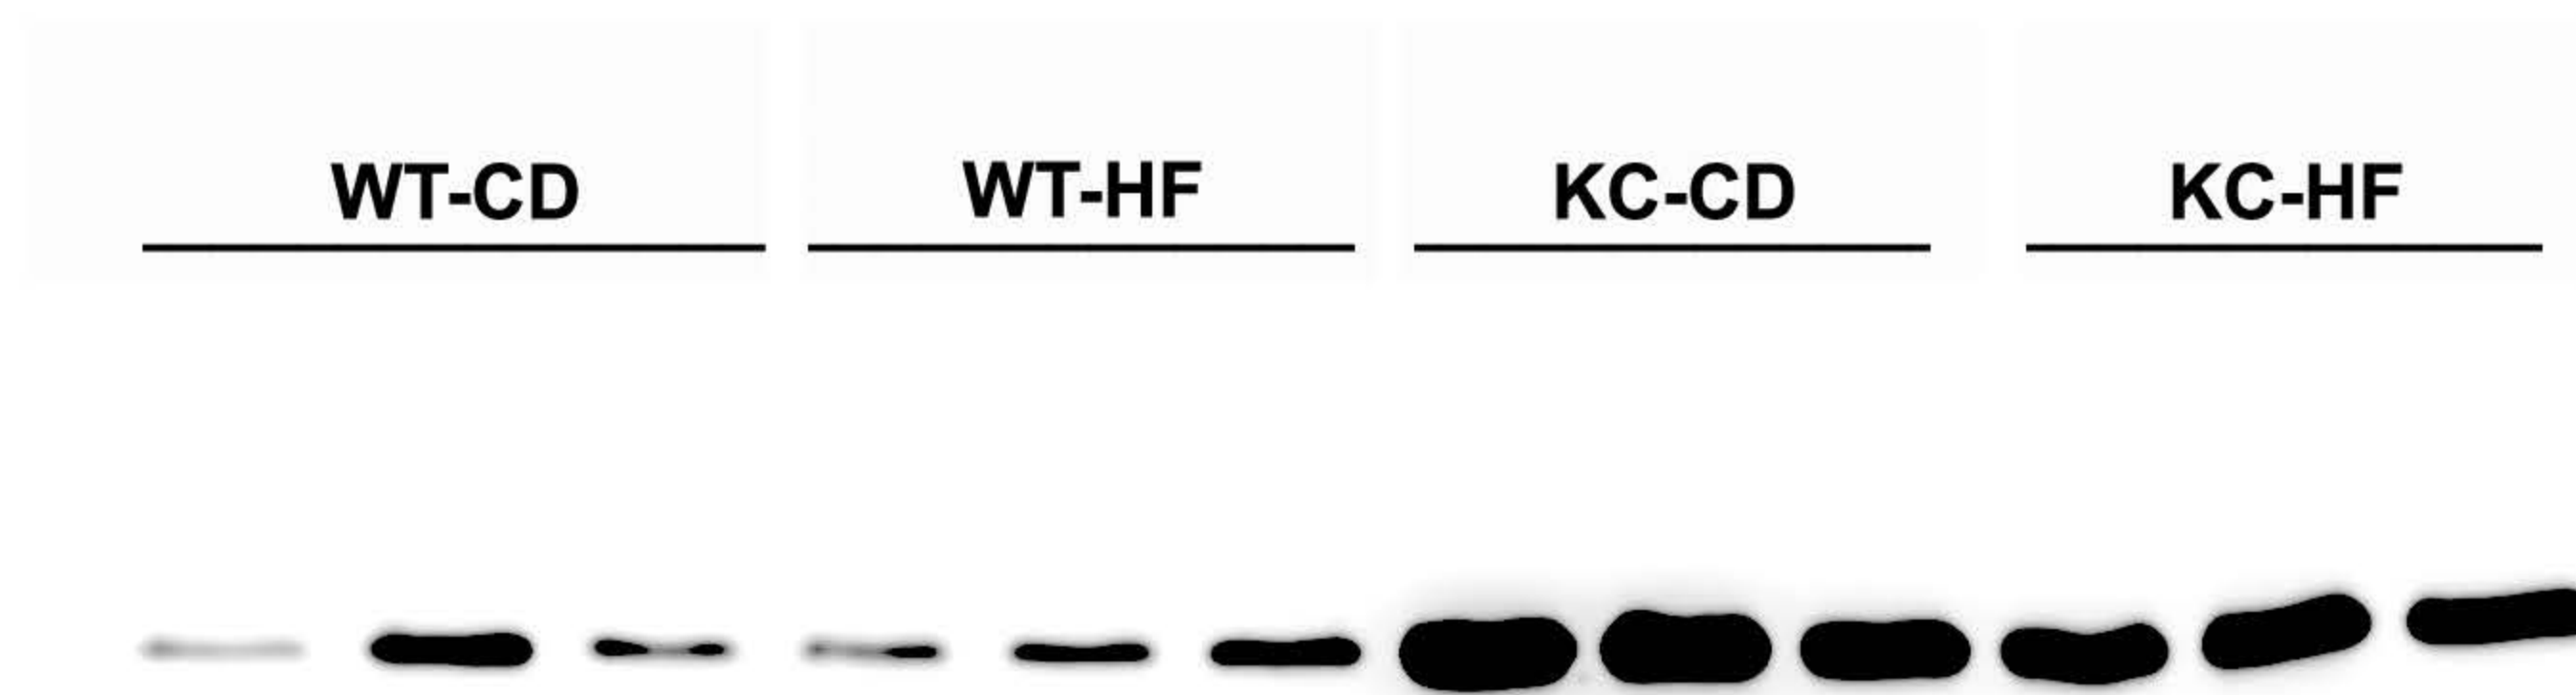

Supplement: S3 (10.1371/journal.pone.0184455.s003) [file redirect.do]

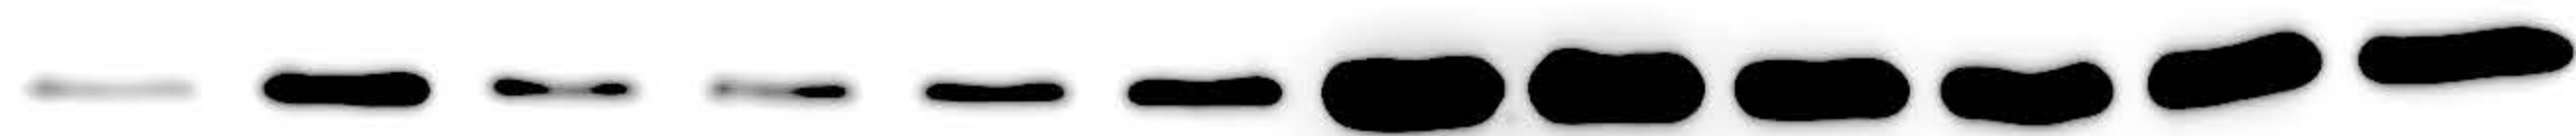

Supplement: S3 (10.1371/journal.pone.0184455.s003) [file redirect.do]

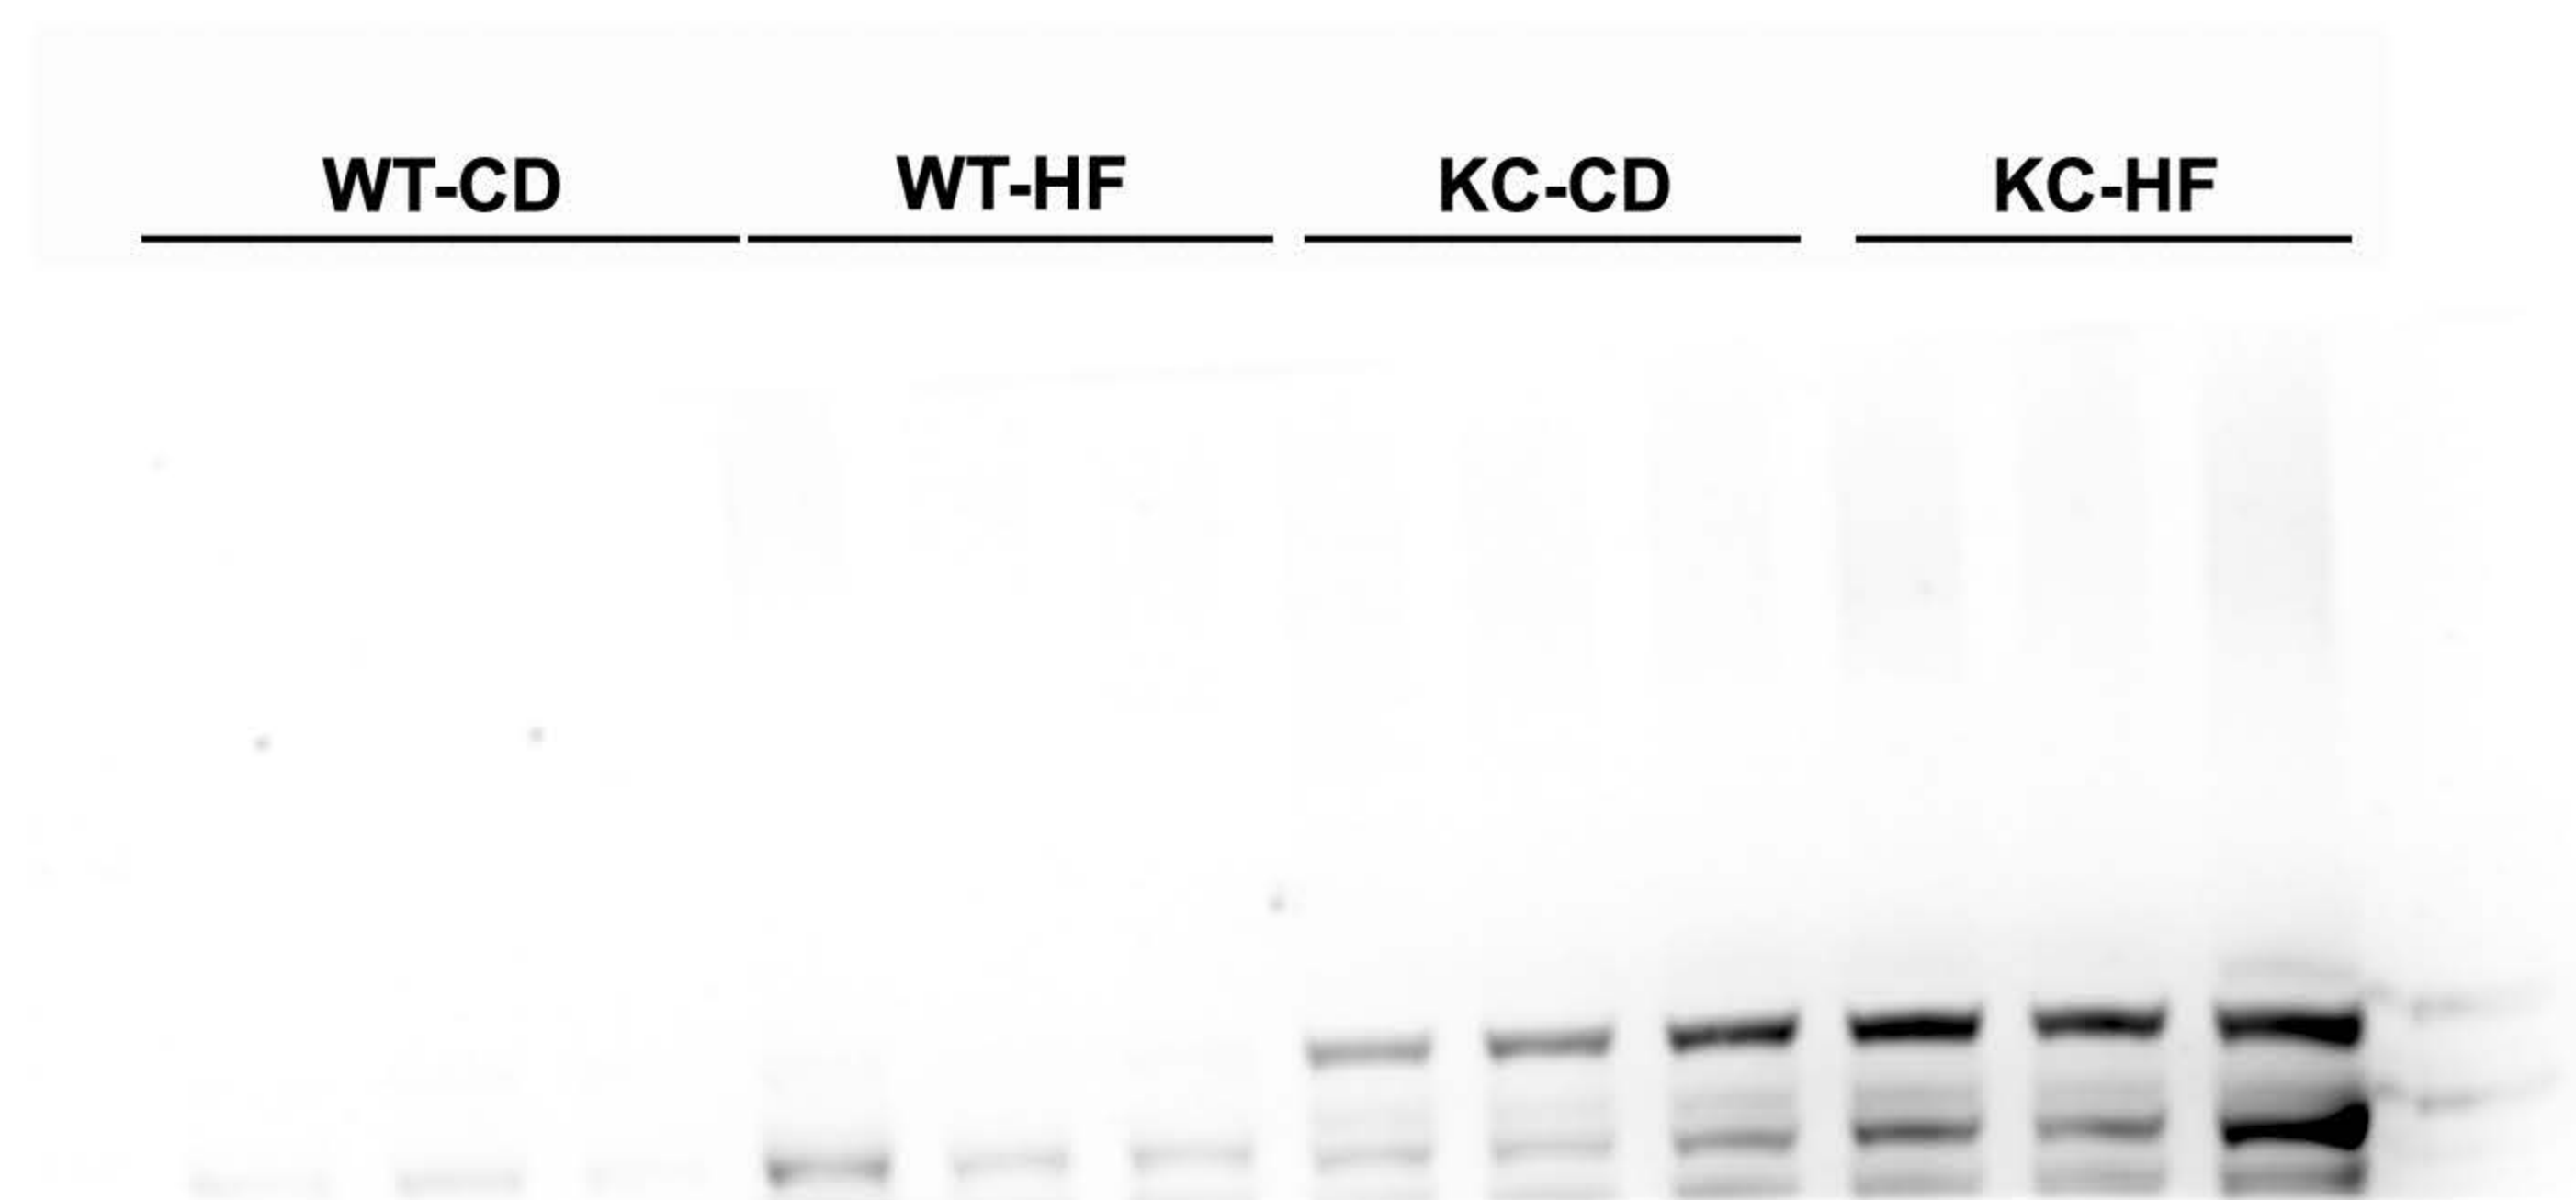

Supplement: S3 (10.1371/journal.pone.0184455.s003) [file redirect.do]

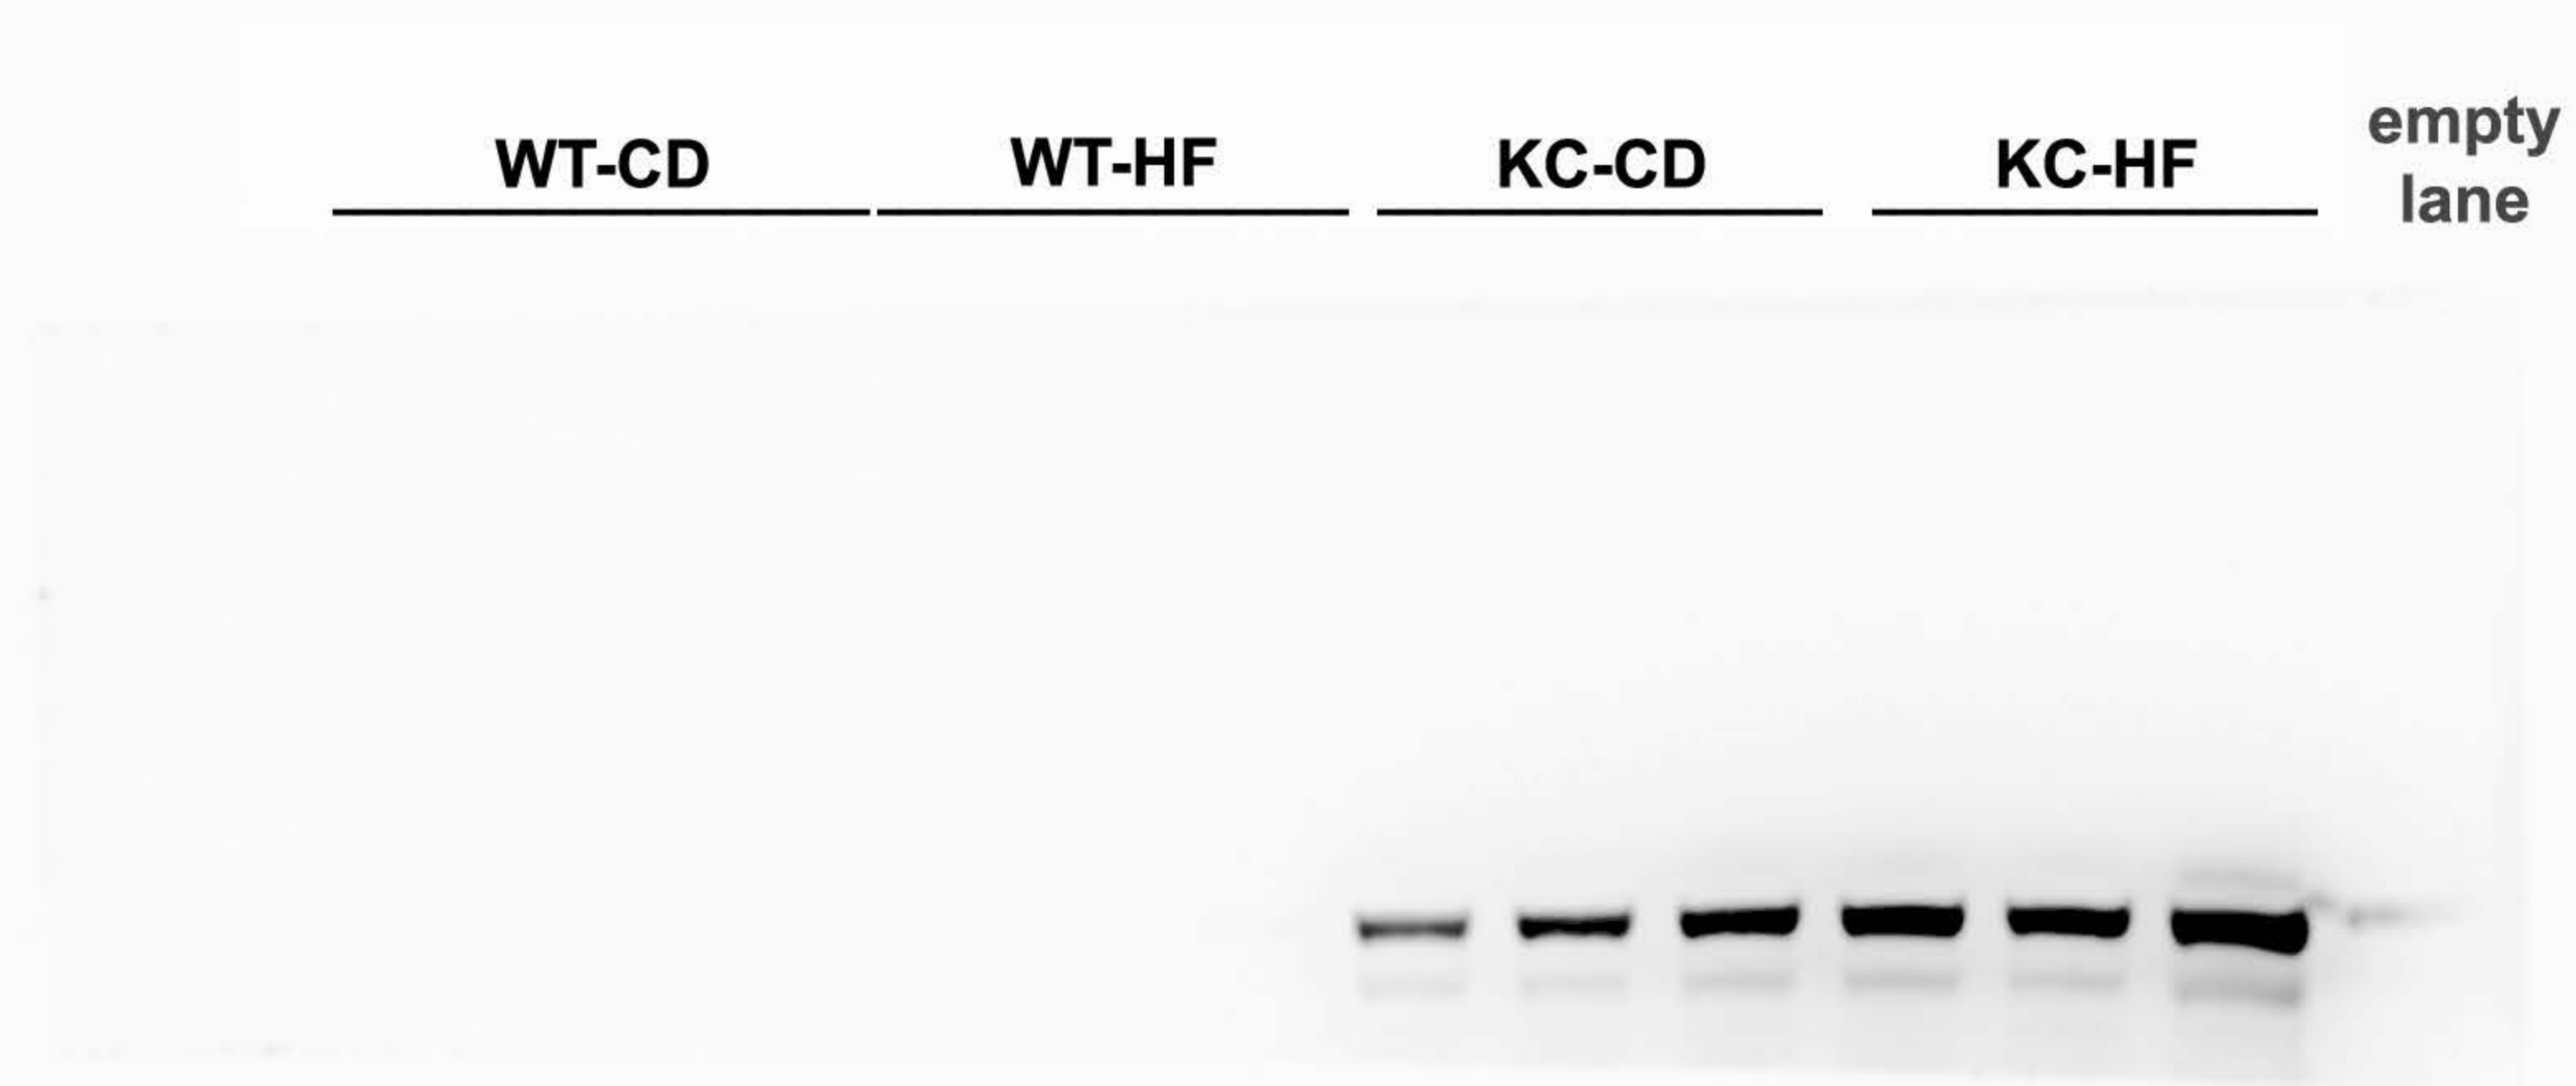

Supplement: S3 (10.1371/journal.pone.0184455.s003) [file redirect.do]

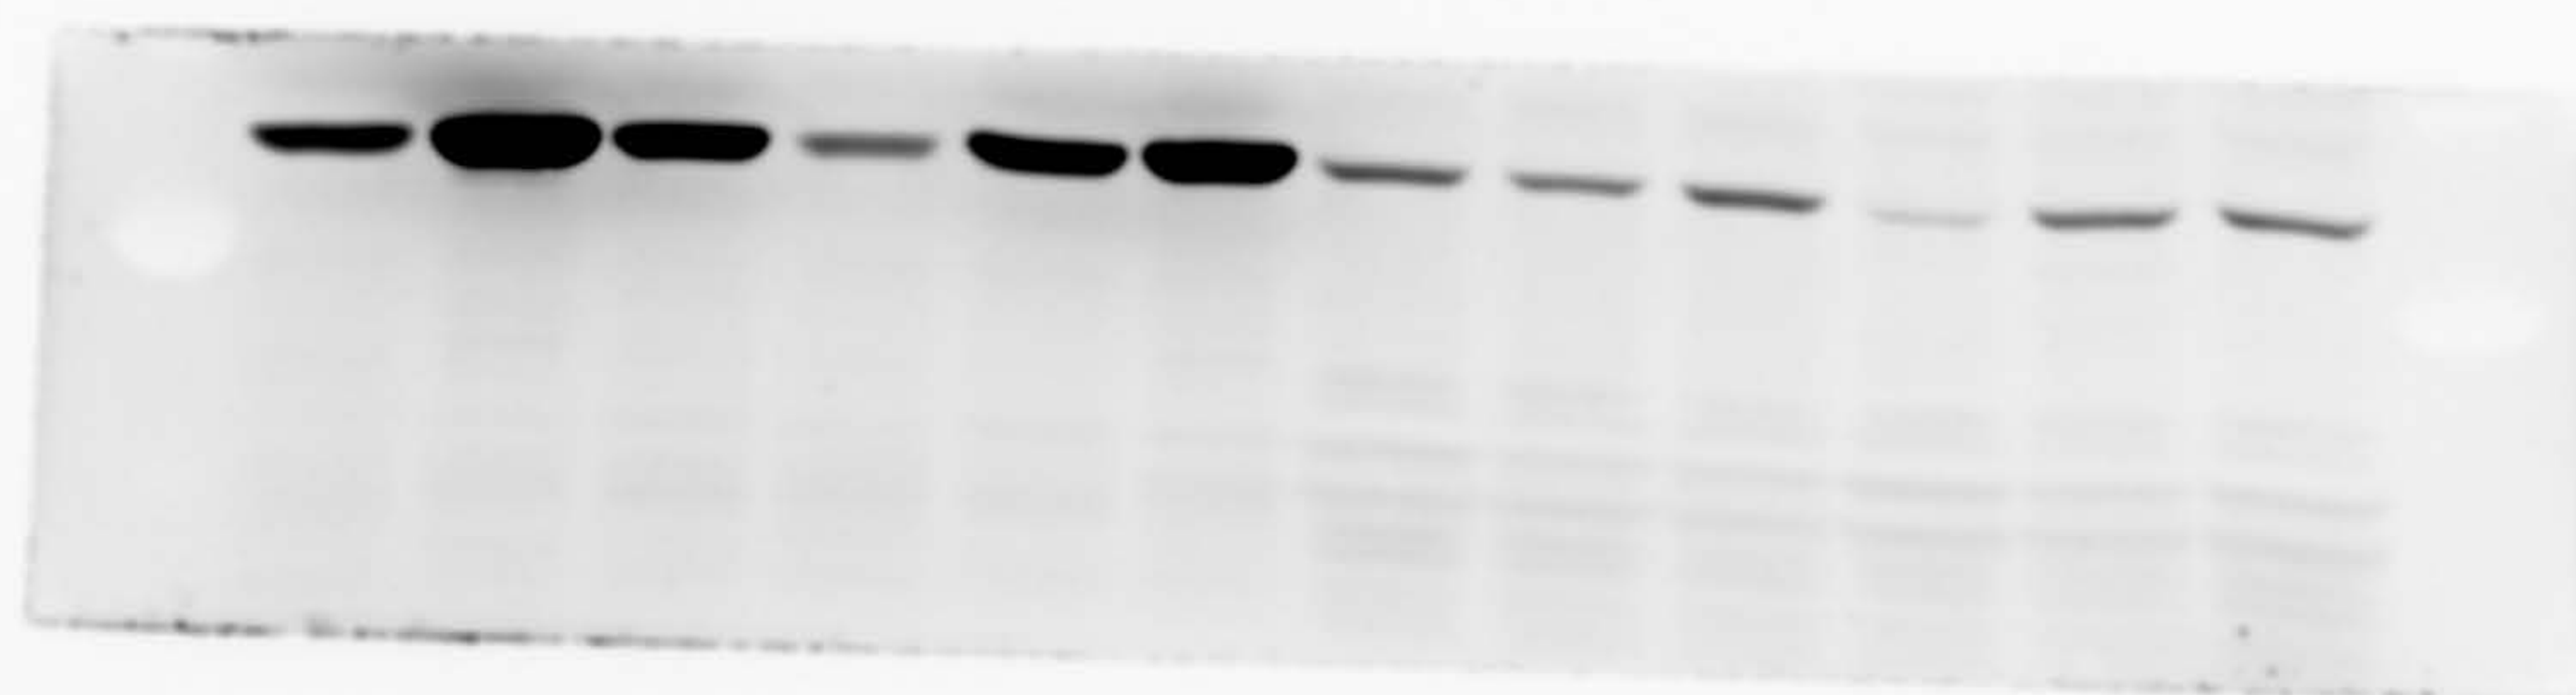

Supplement: S3 (10.1371/journal.pone.0184455.s003) [file redirect.do]

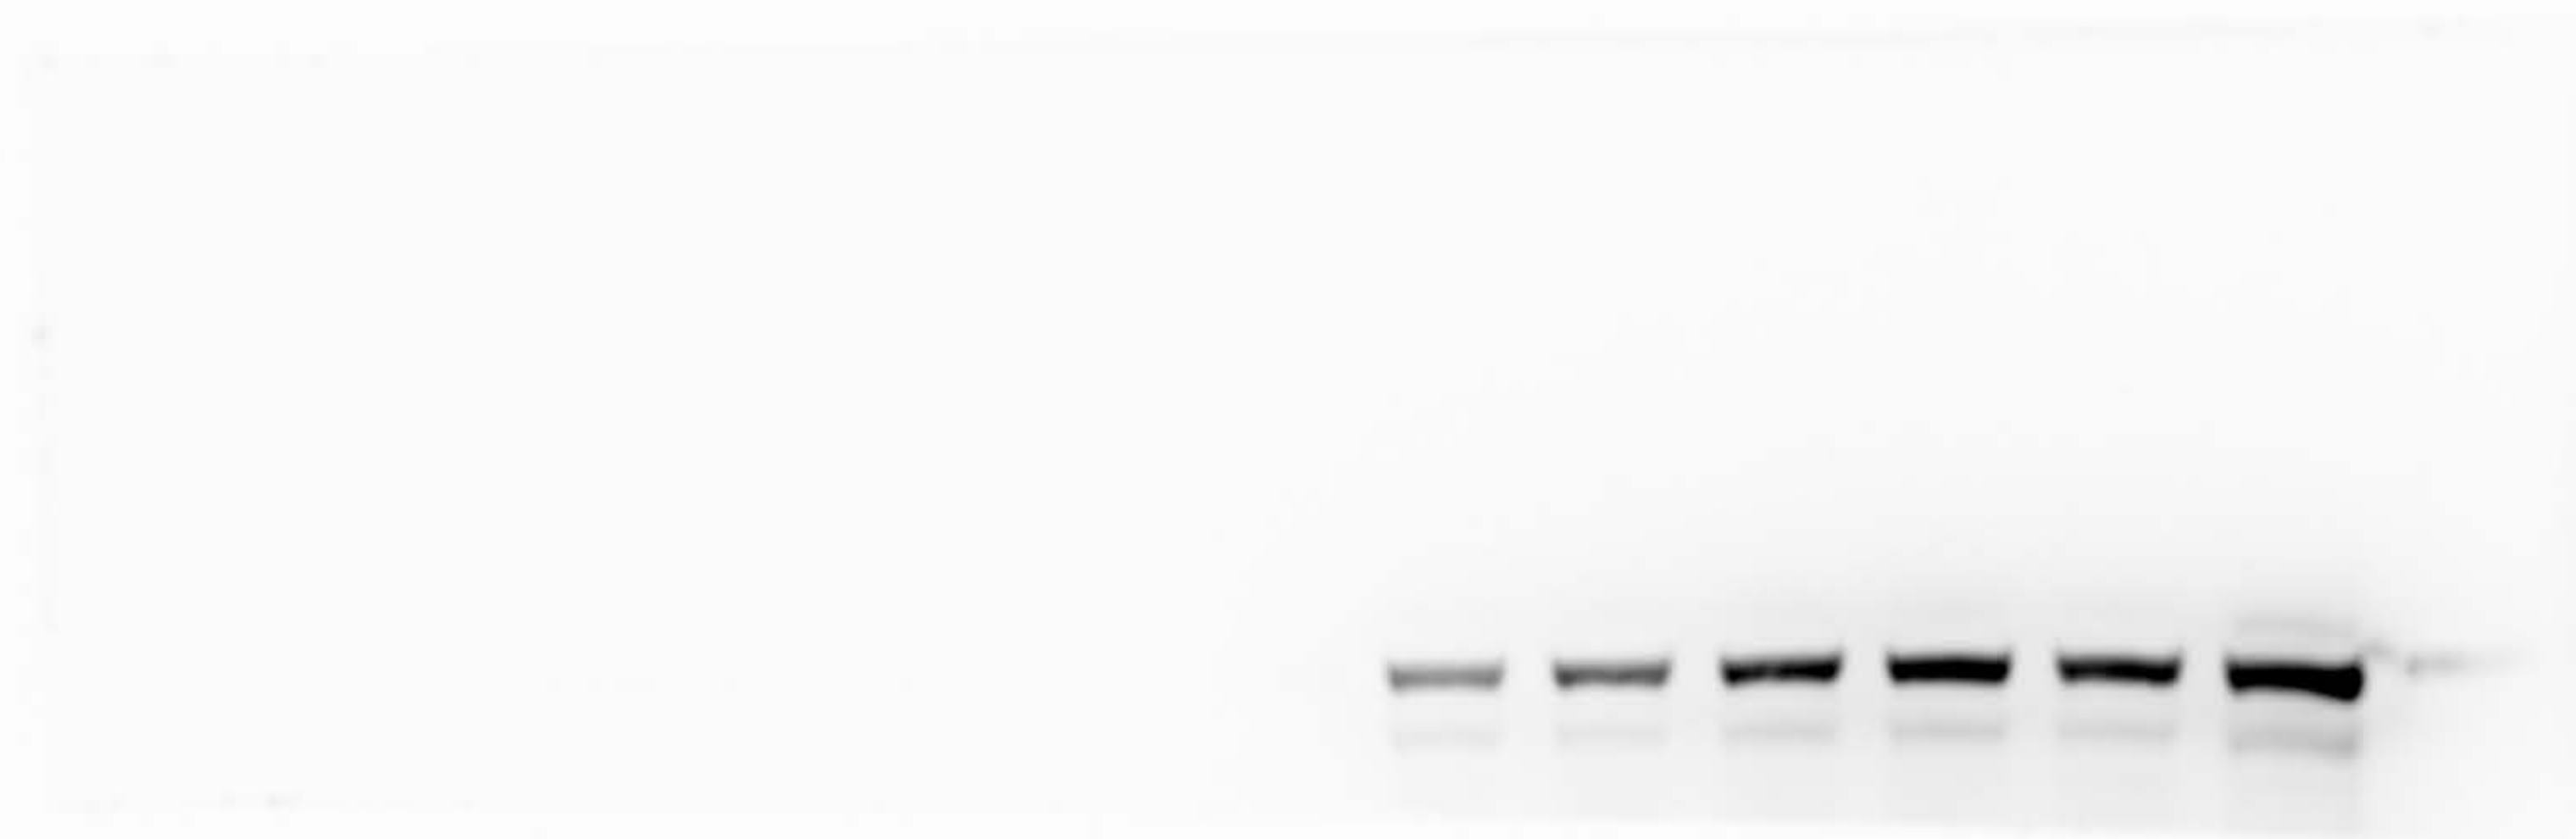

Supplement: S3 (10.1371/journal.pone.0184455.s003) [file redirect.do]

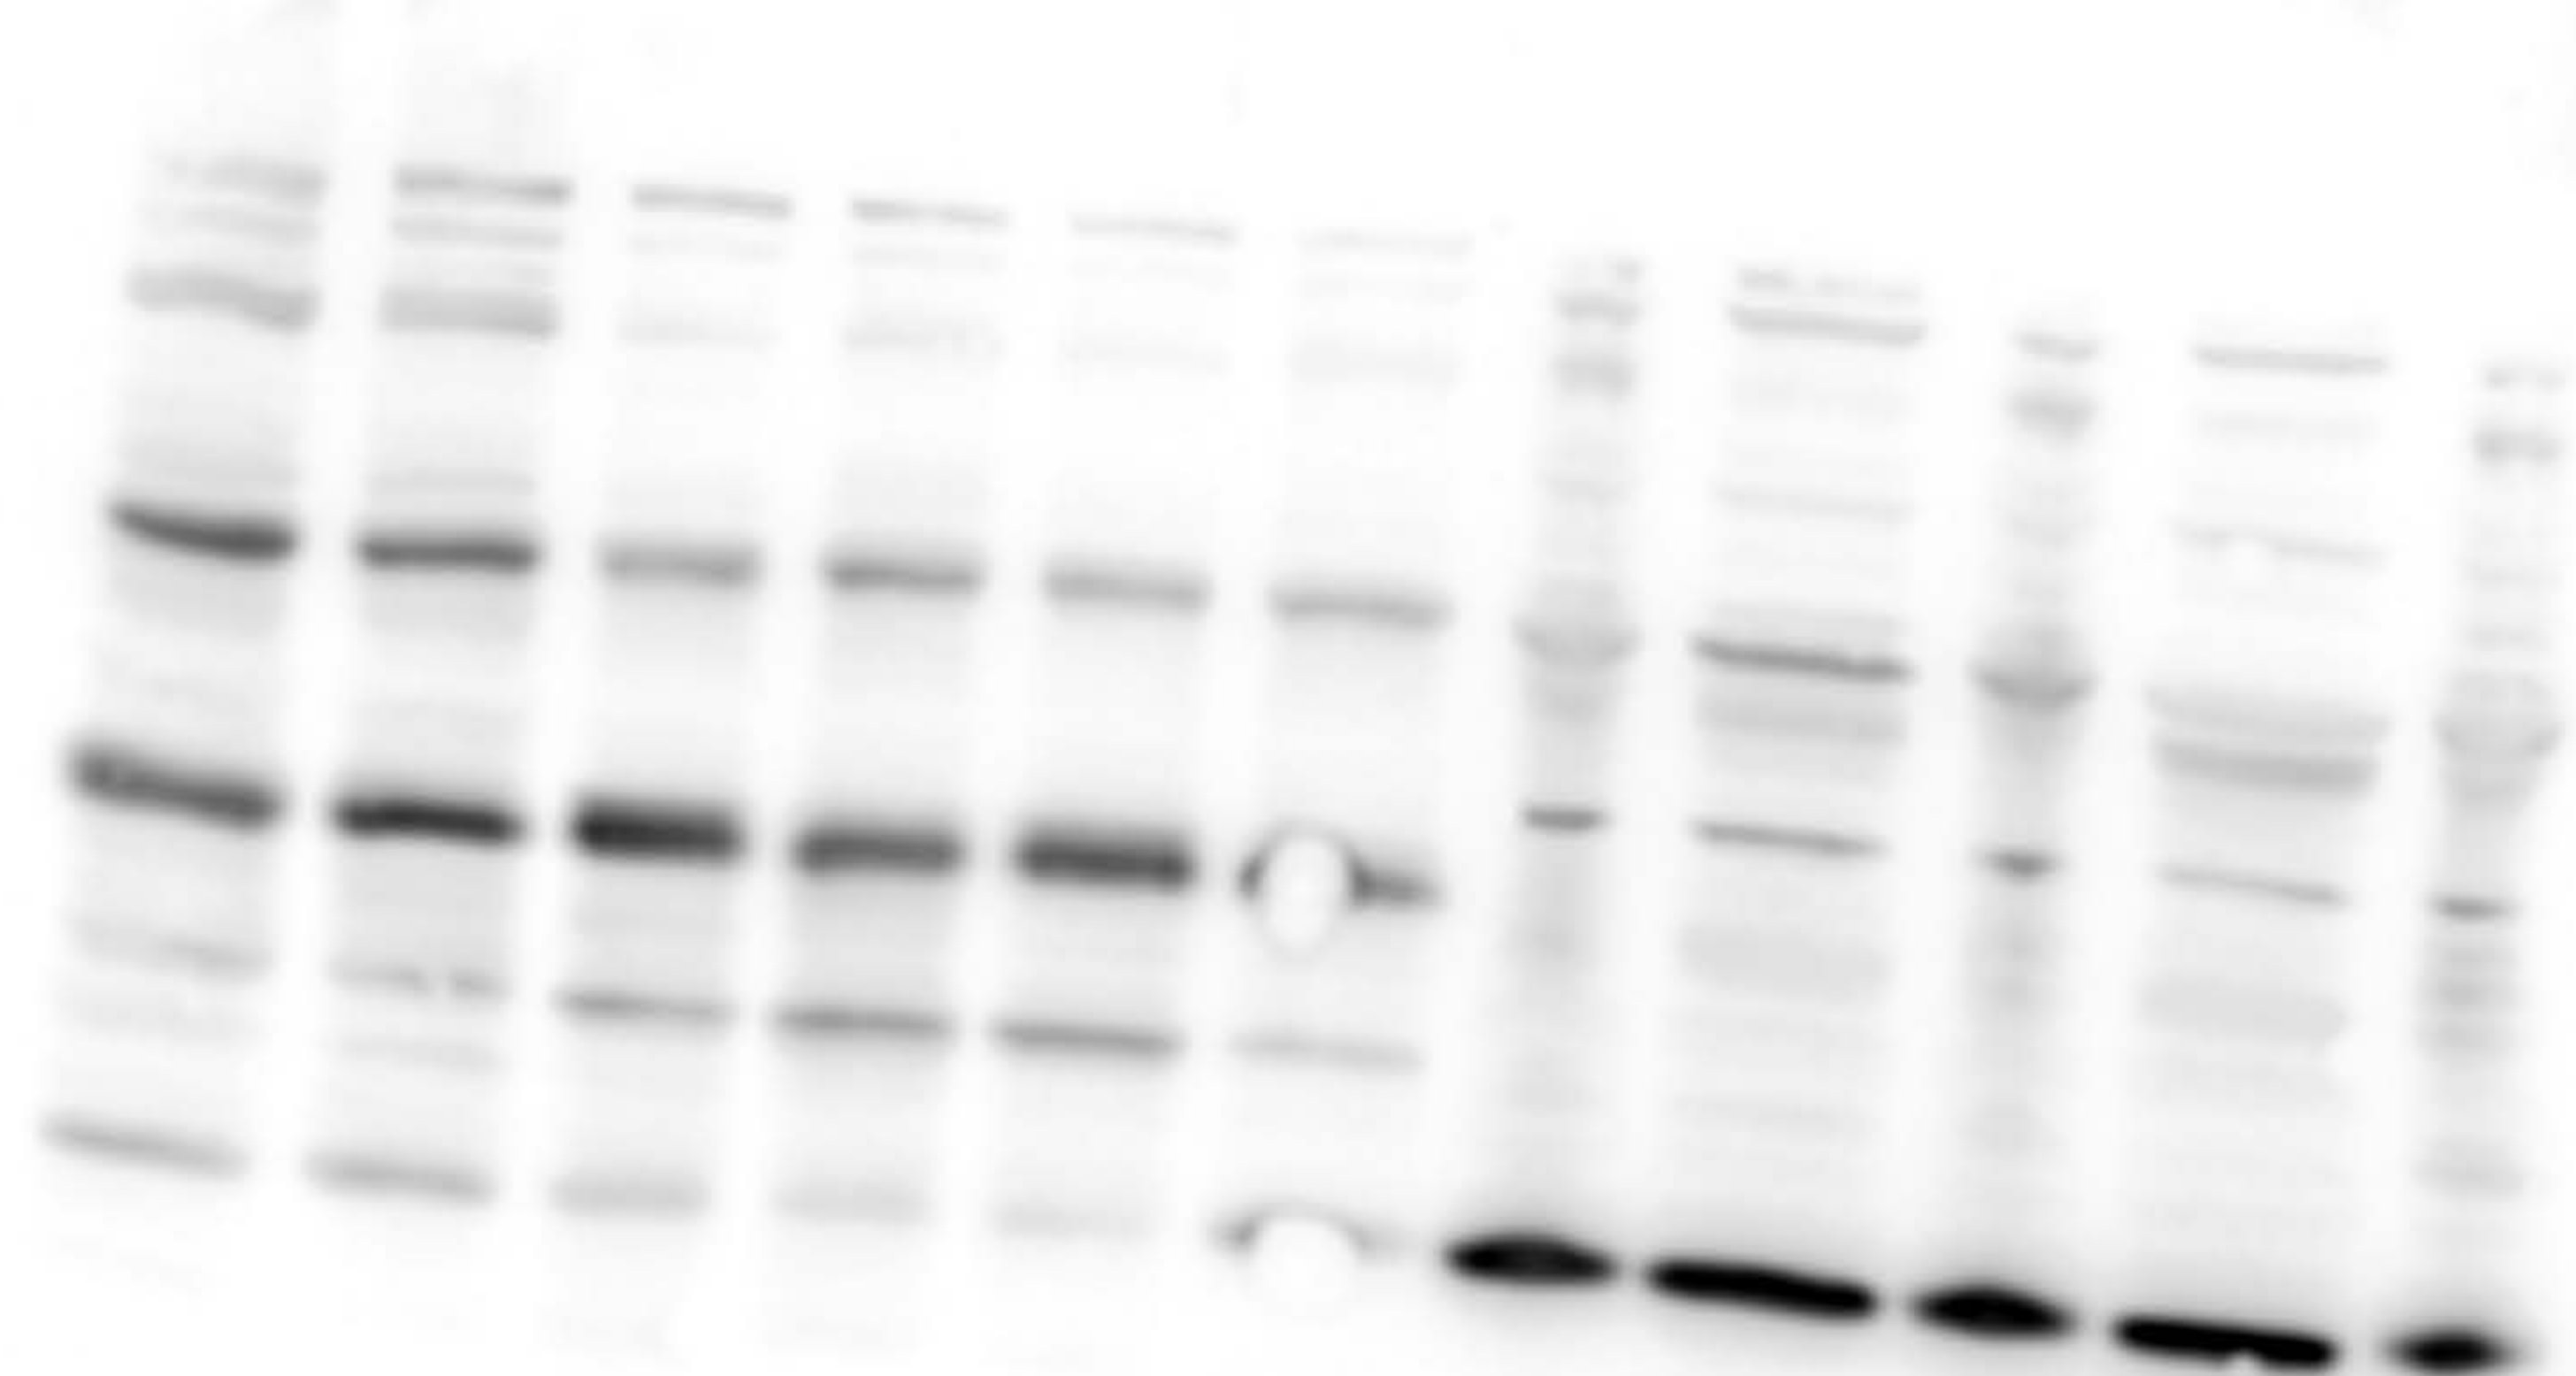

Supplement: S3 (10.1371/journal.pone.0184455.s003) [file redirect.do]

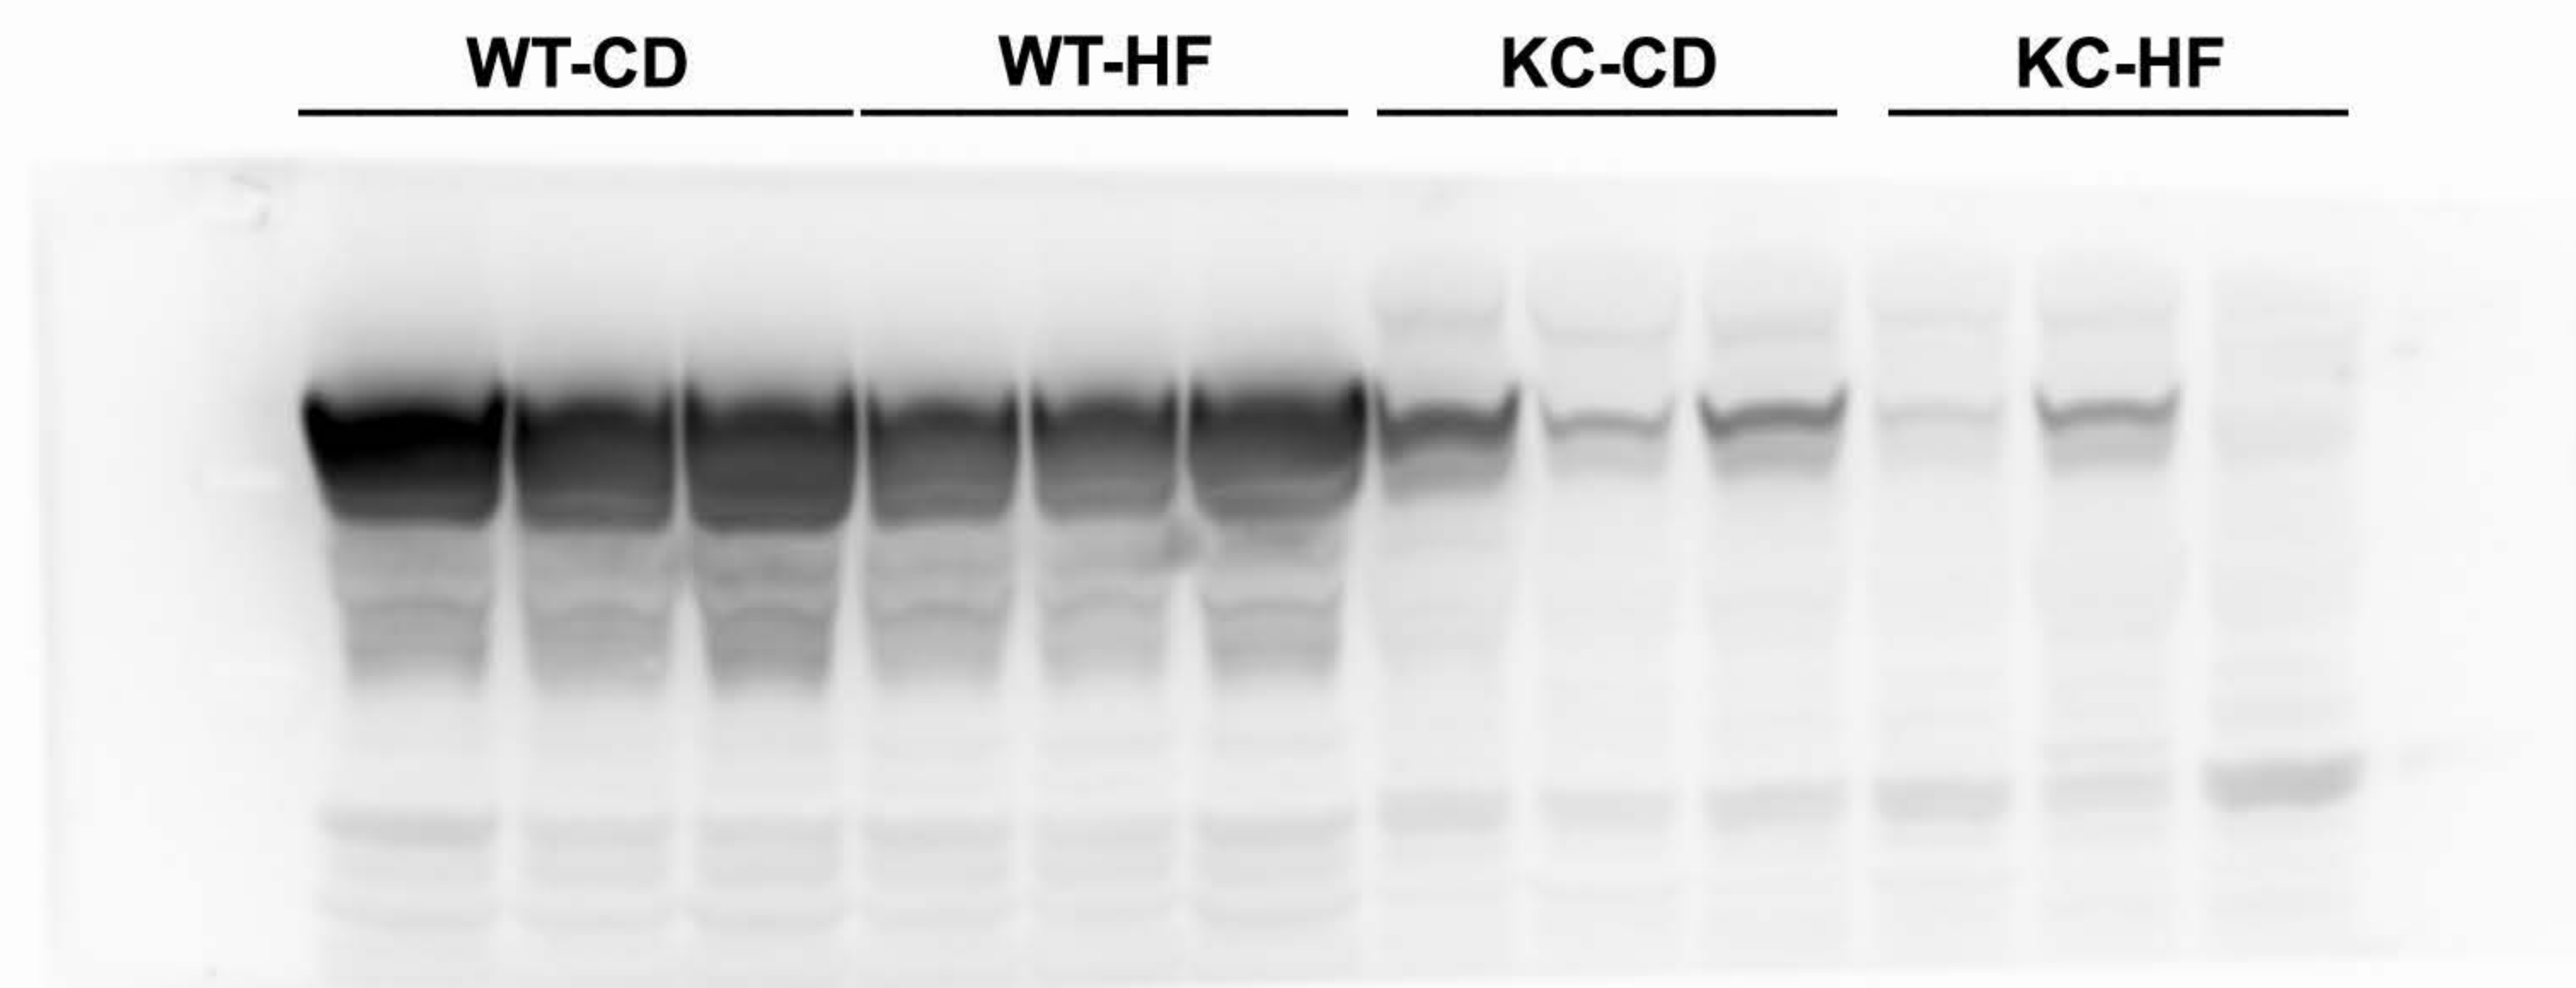

Supplement: S3 (10.1371/journal.pone.0184455.s003) [file redirect.do]

KC-HF

KC-CD

WT-HF

WT-CD

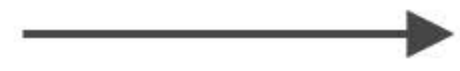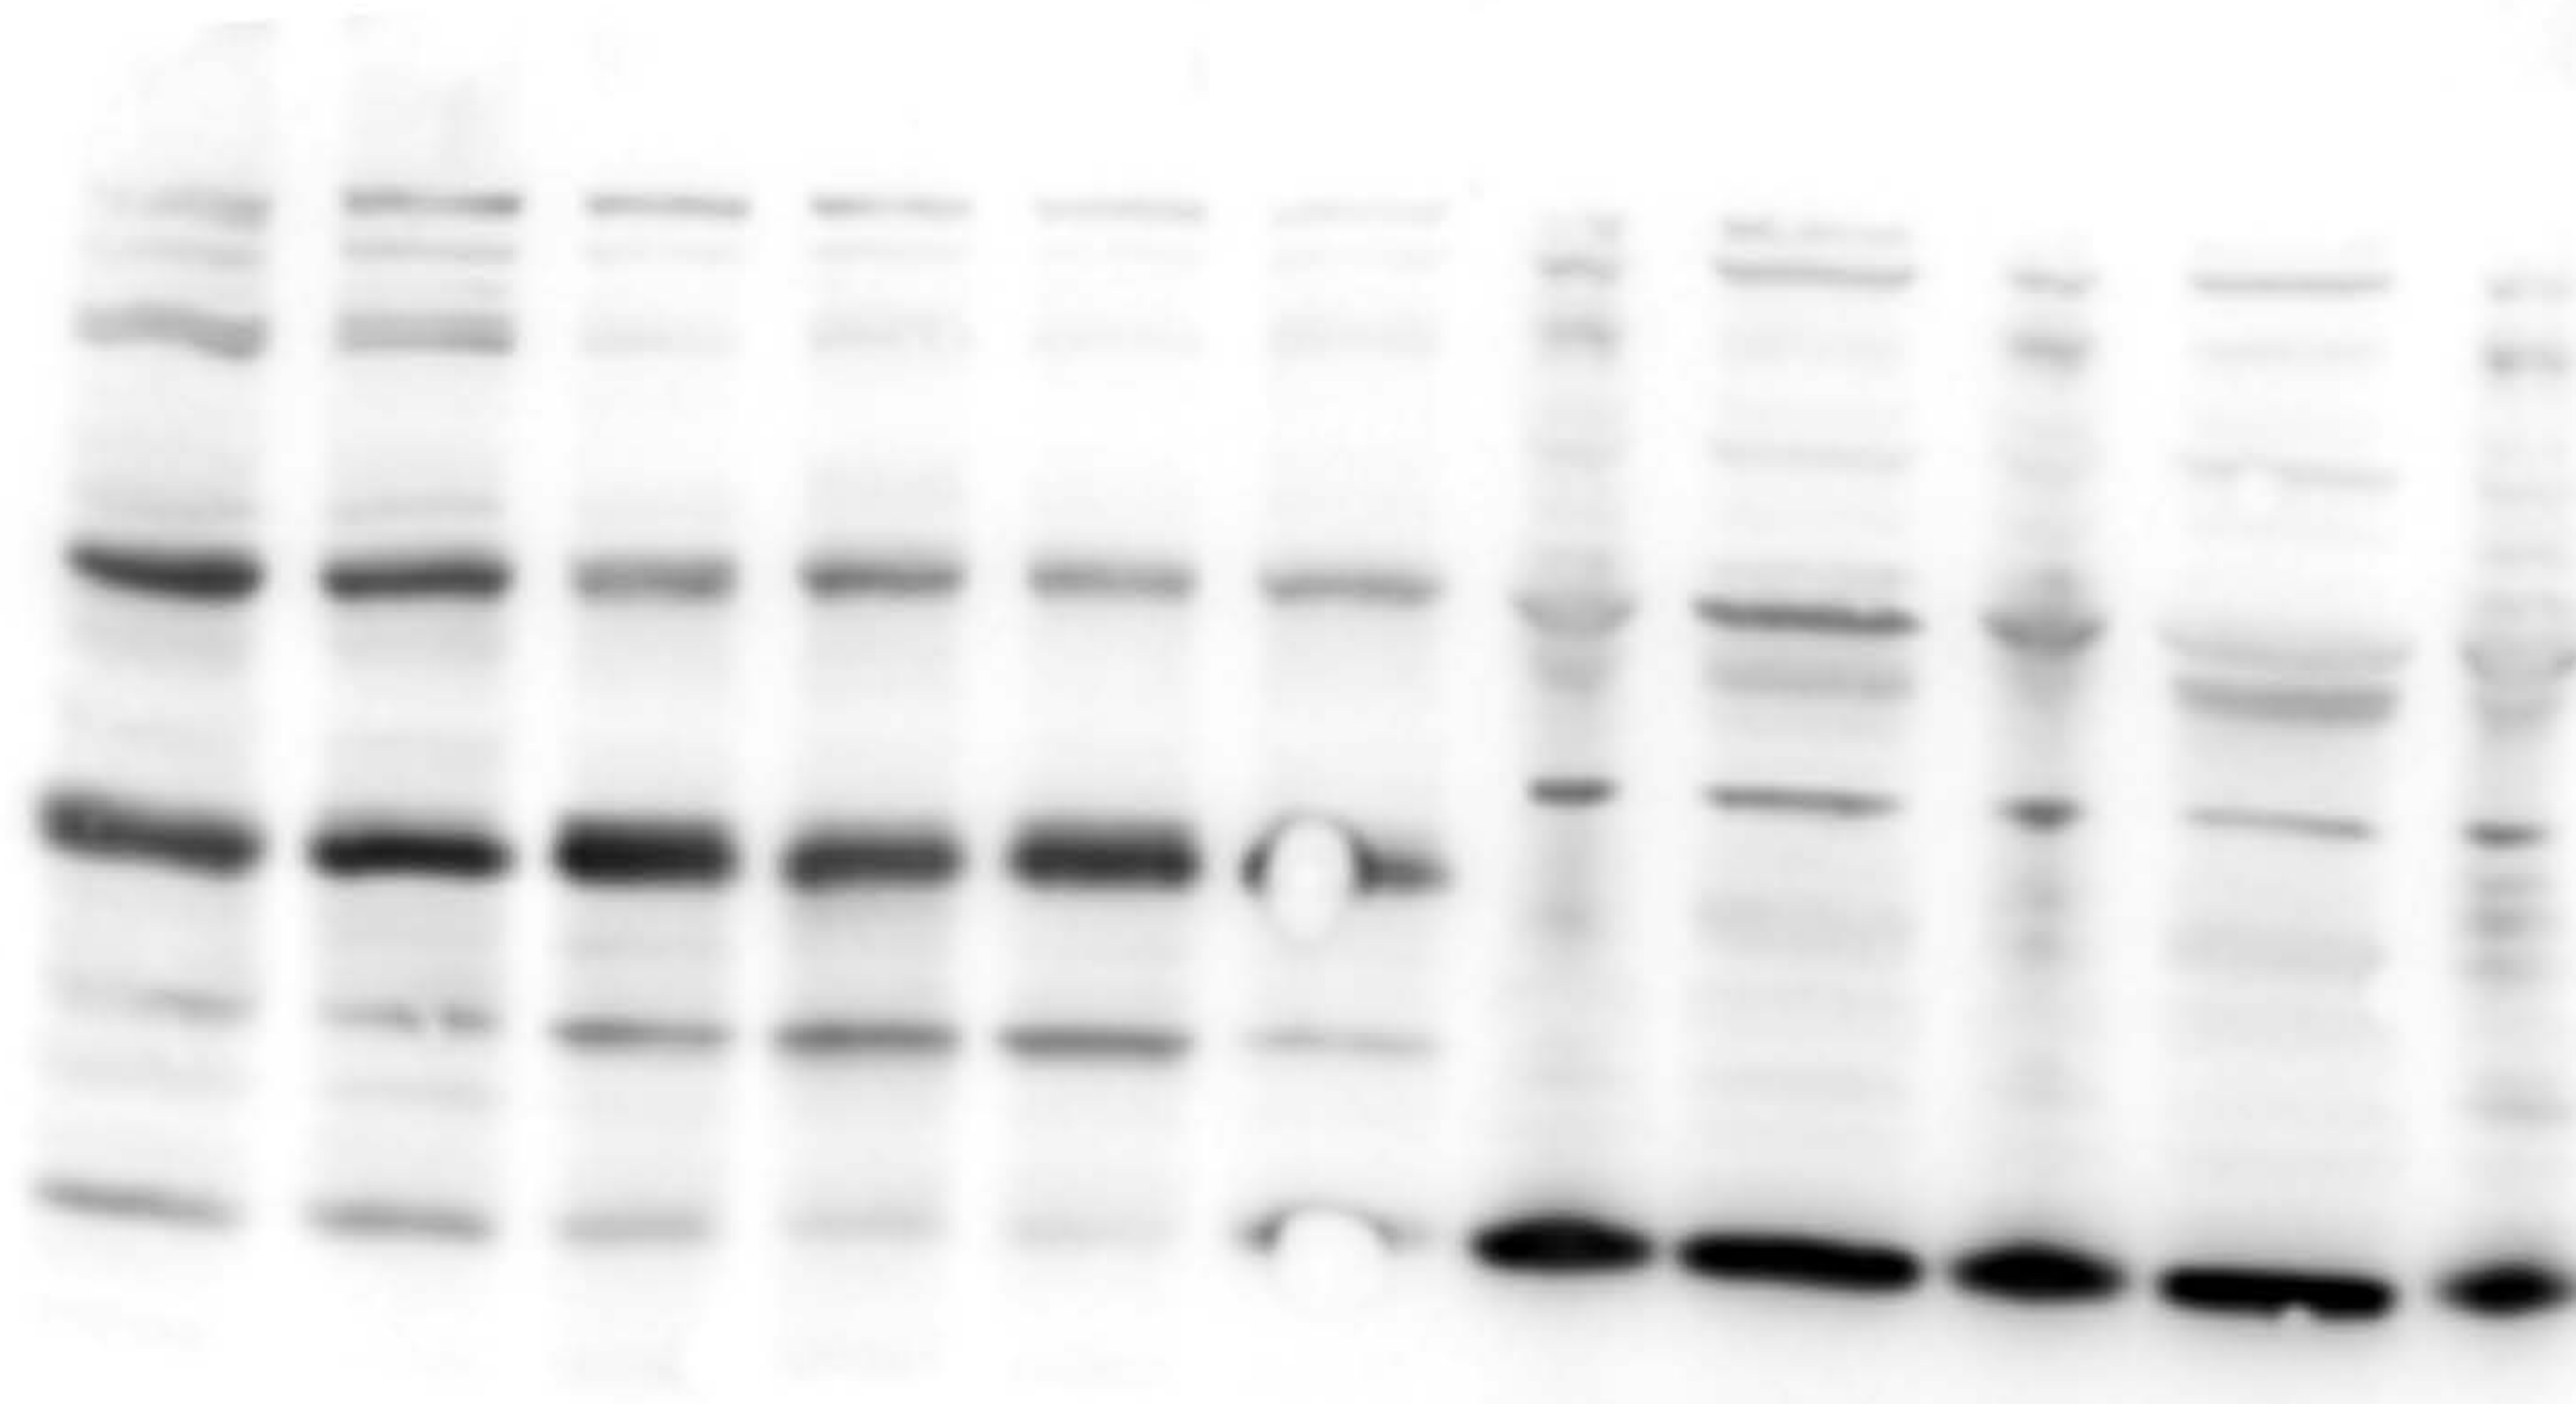

Supplement: S3 (10.1371/journal.pone.0184455.s003) [file redirect.do]

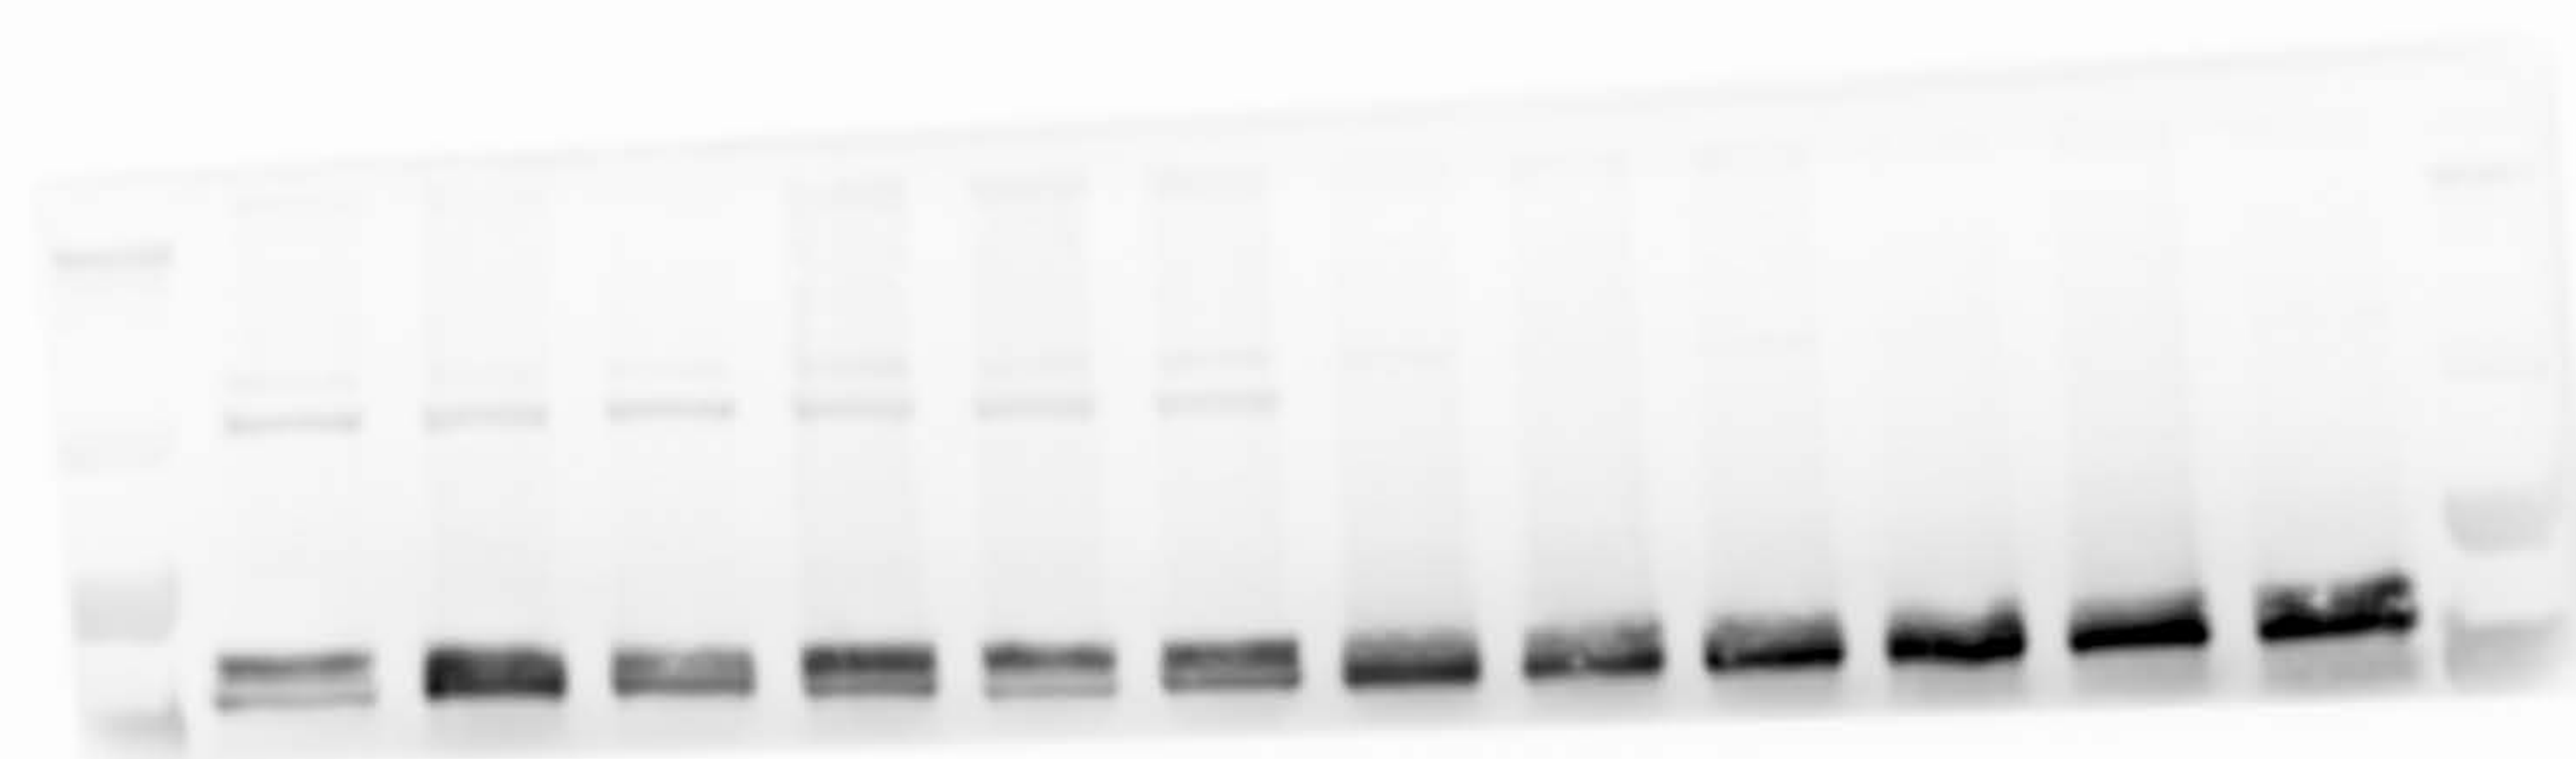

Supplement: S3 (10.1371/journal.pone.0184455.s003) [file redirect.do]

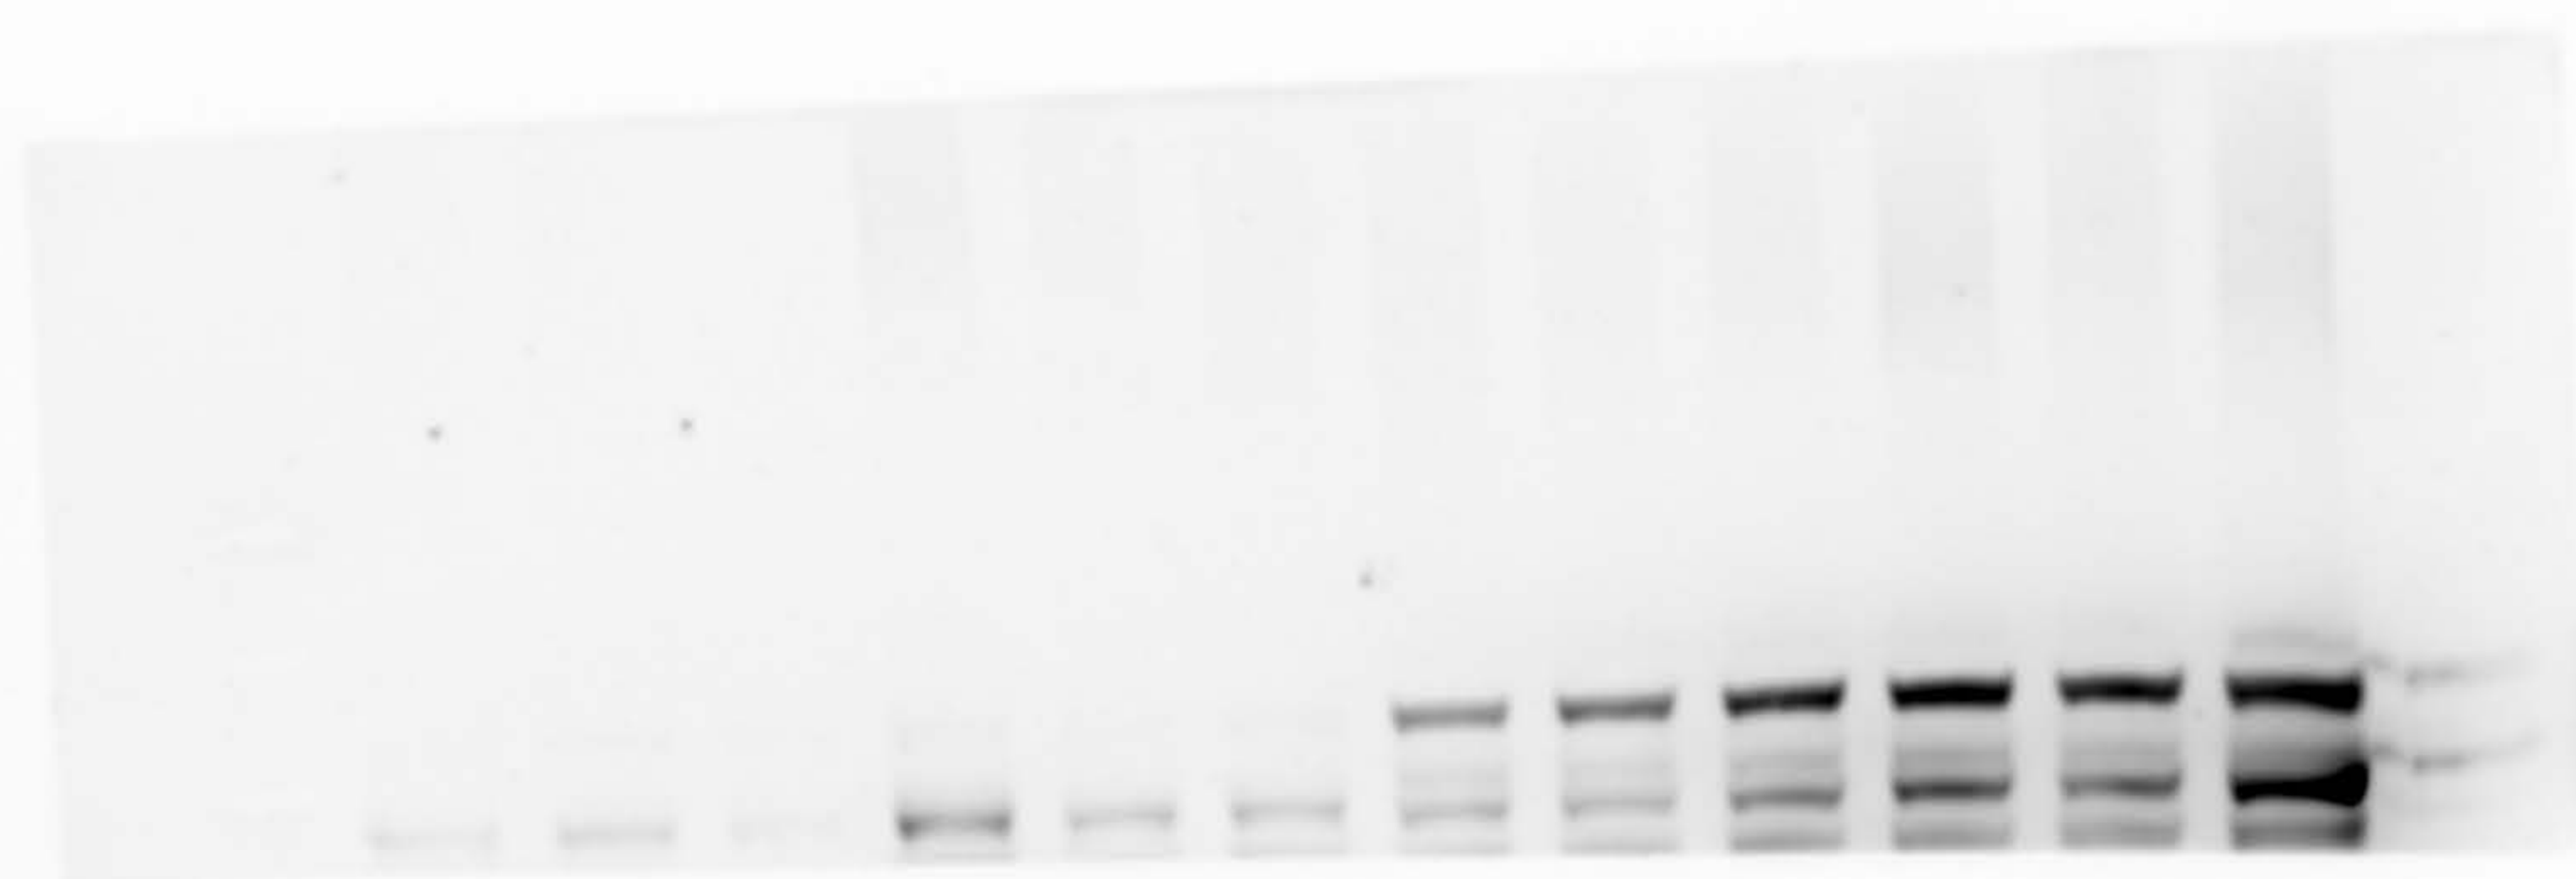

Supplement: S3 (10.1371/journal.pone.0184455.s003) [file redirect.do]

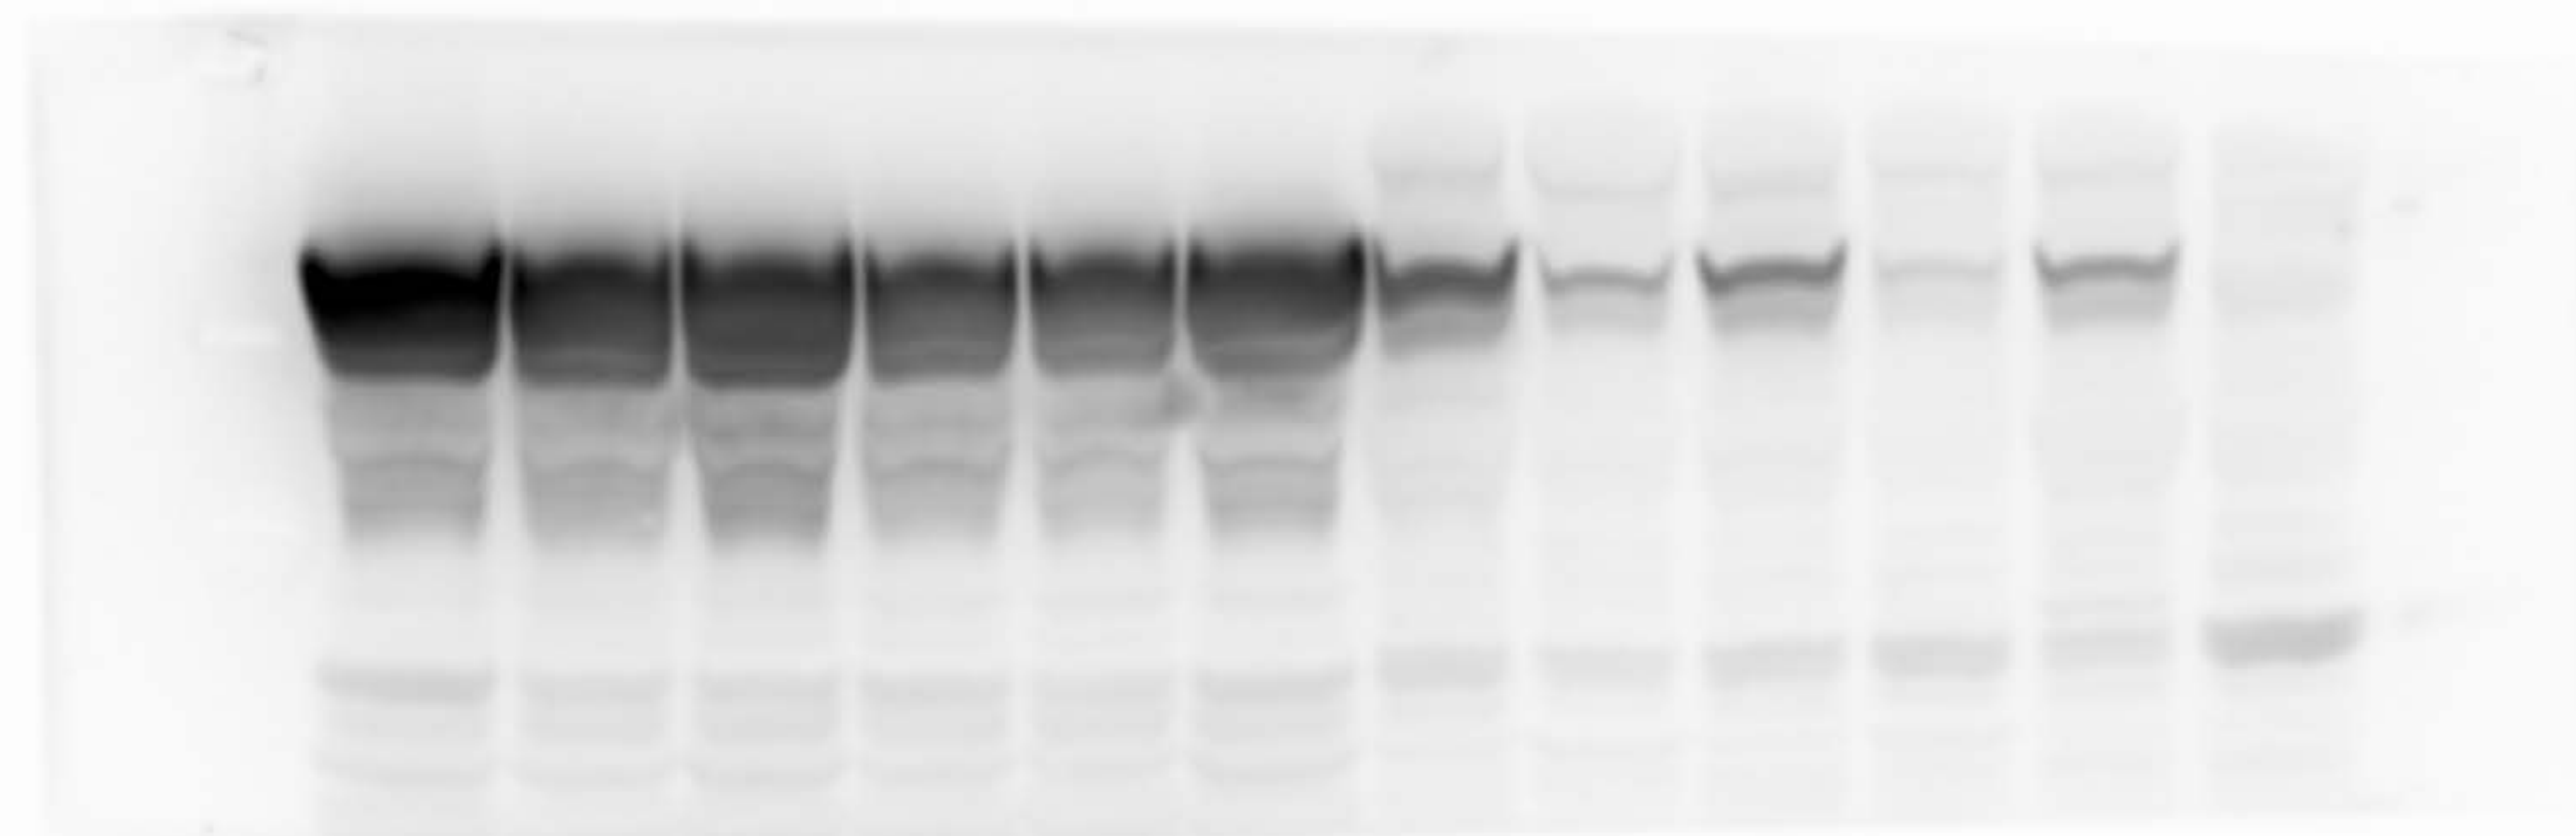

Supplement: S3 (10.1371/journal.pone.0184455.s003) [file redirect.do]

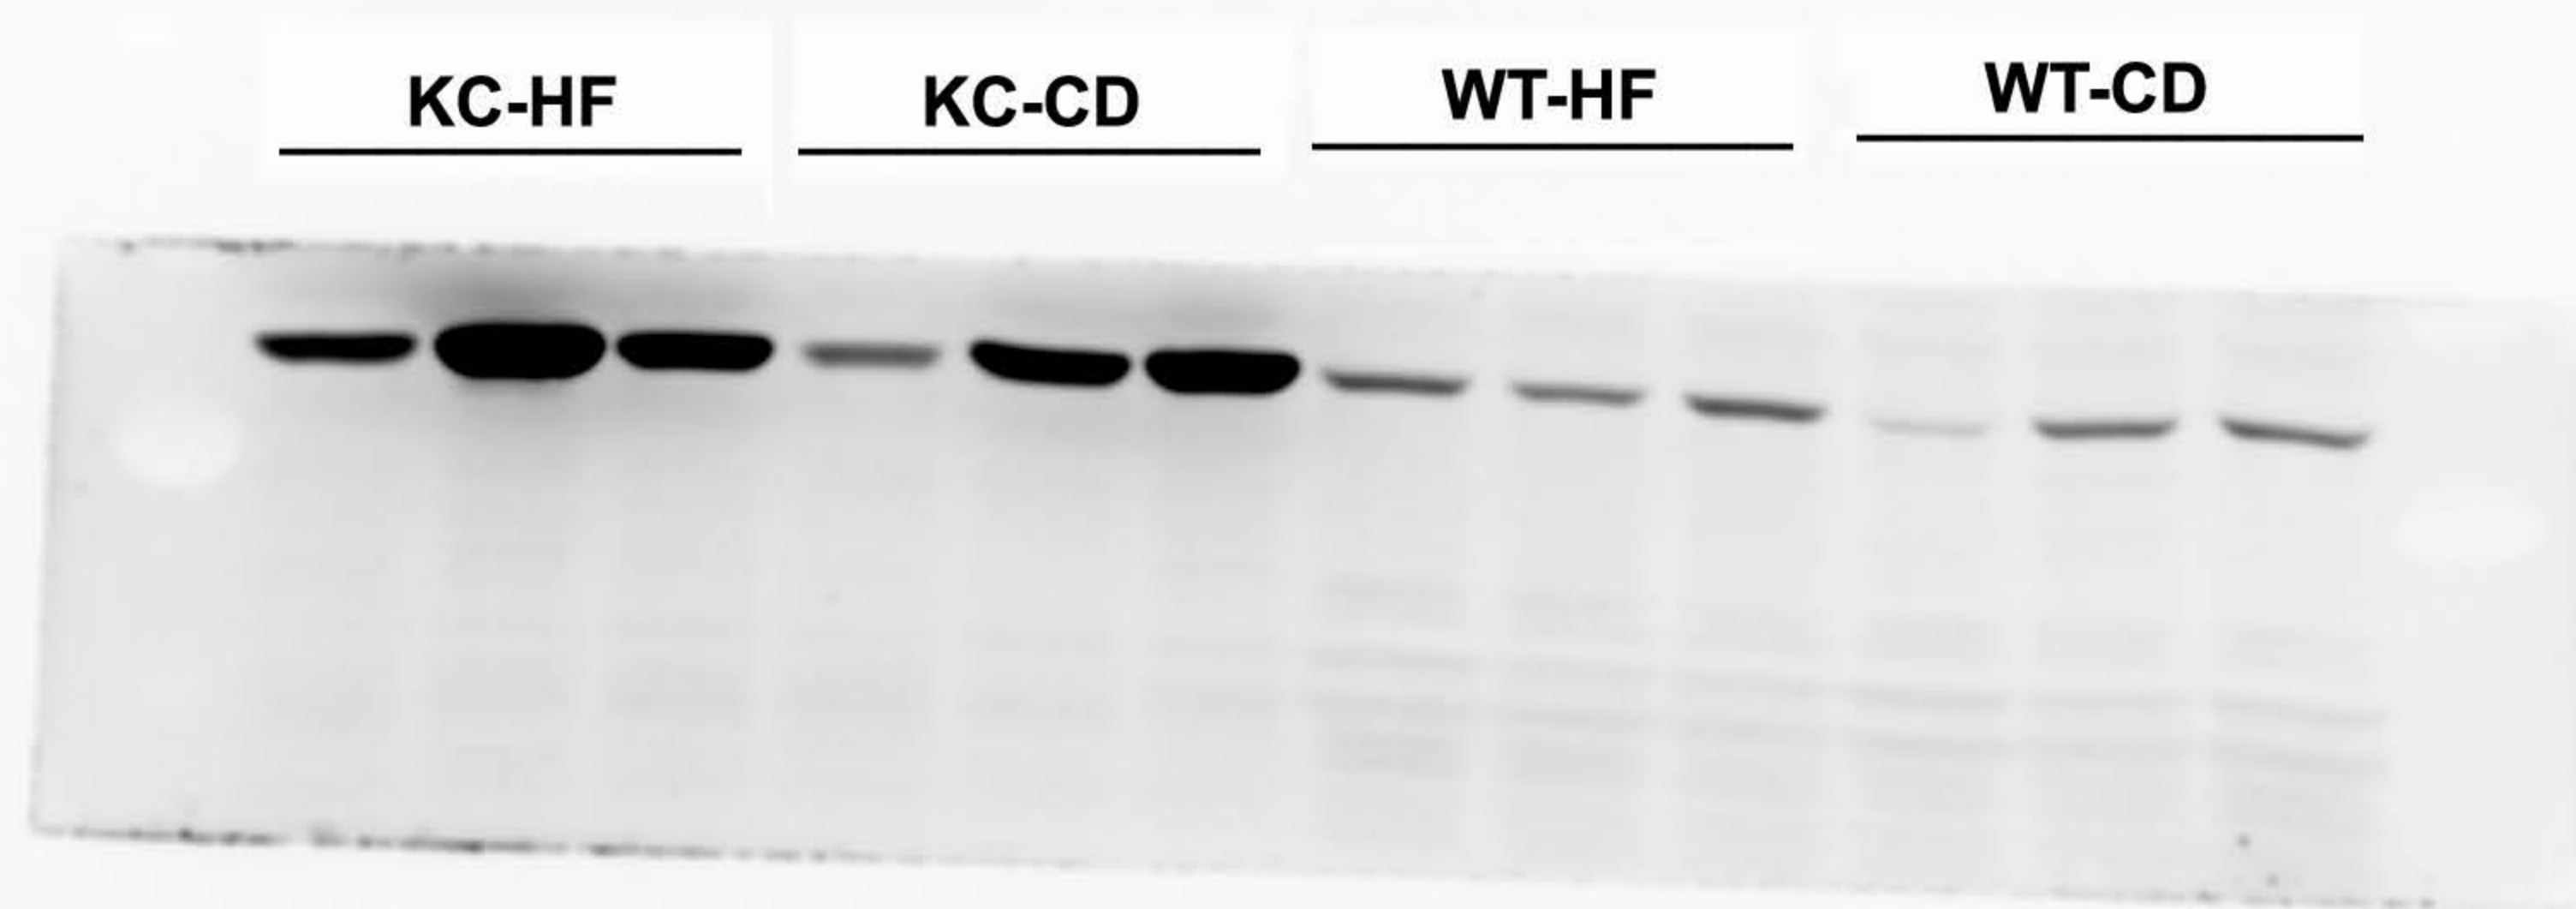

Supplement: S3 (10.1371/journal.pone.0184455.s003) [file redirect.do]

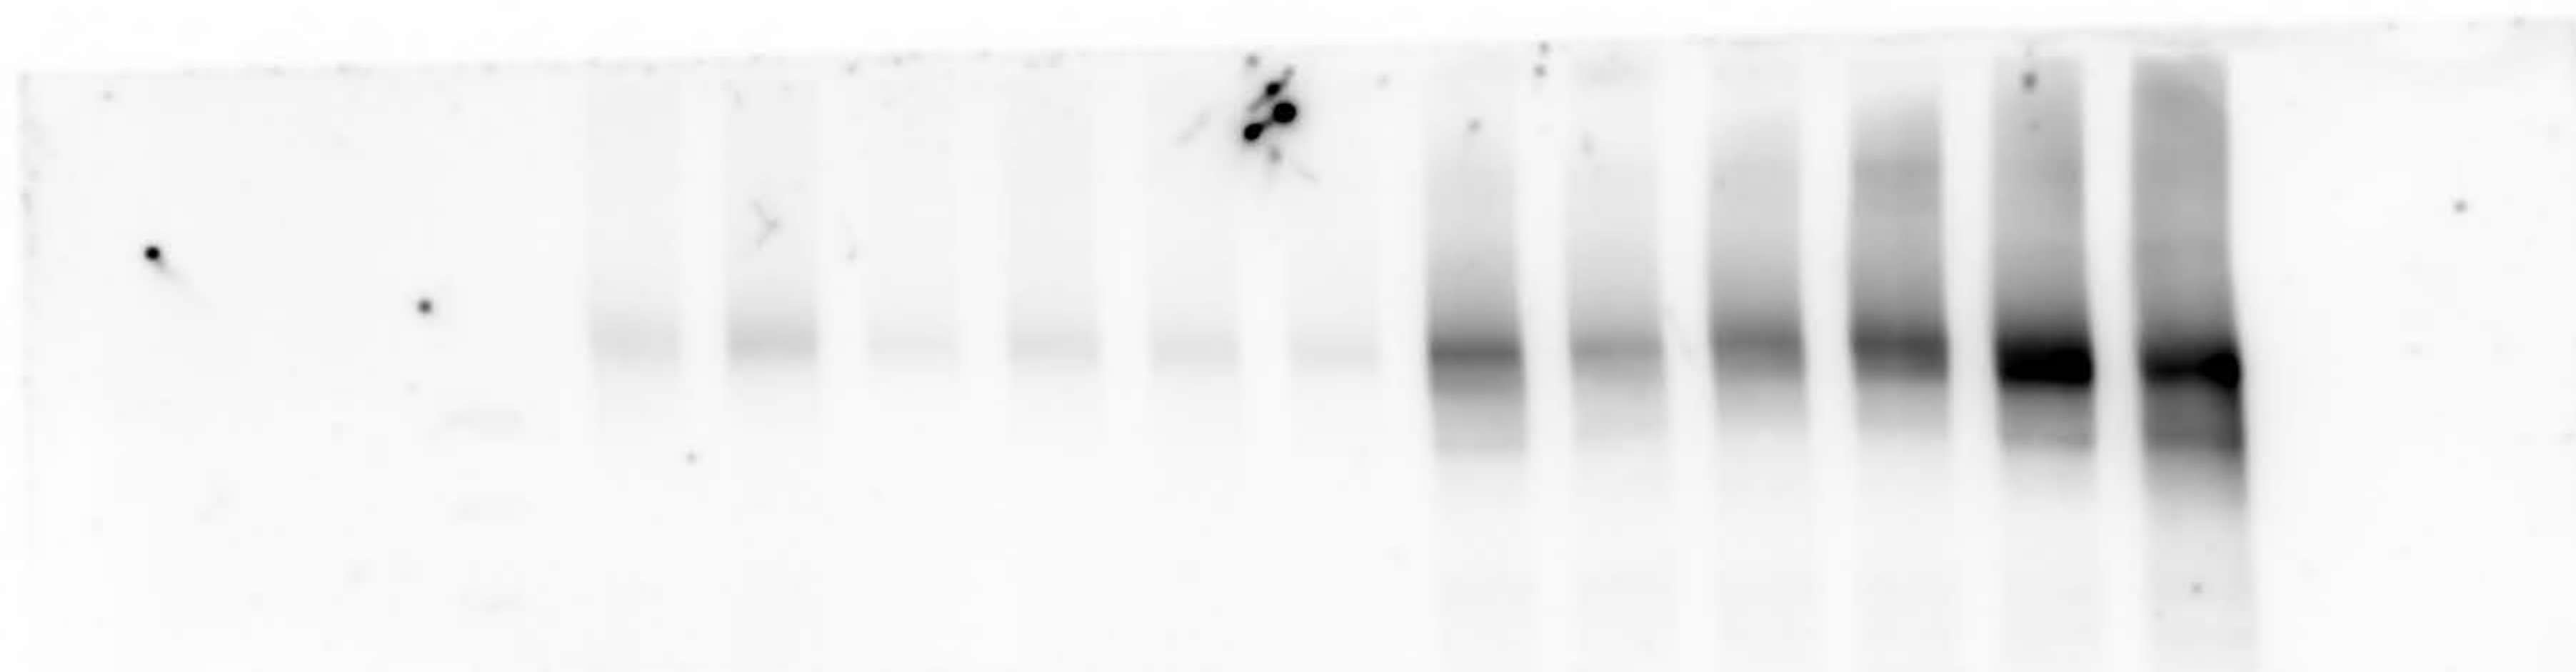

Supplement: S3 (10.1371/journal.pone.0184455.s003) [file redirect.do]
